# Supplementary material for: On existence of Two Classes of Generalized Howell Designs with Block Size Three and Index Two
Source: Springer Nature journal article supplement (doi:10.1007/s00373-020-02198-1), 2020-06-05
Supplement: 373_2020_2198_MOESM1_ESM.pdf [file 373_2020_2198_MOESM1_ESM.pdf]

## Appendix

Table 9 Starter blocks and adders for (3,2)-DRGDDs of type  $3^u$ 

| $u$ | Starter           | Adder | Starter+Adder     | Starter            | Adder | Starter+Adder     |
|-----|-------------------|-------|-------------------|--------------------|-------|-------------------|
| 5   | 0, 1, 2           | 0     | 0, 1, 2           | 3, 8, 10           | 8     | 11, 4, 6          |
|     | 4, 7, $\infty_1$  | 3     | 7, 10, $\infty_1$ | 5, 11, $\infty_2$  | 4     | 9, 3, $\infty_2$  |
|     | 6, 9, $\infty_3$  | 11    | 5, 8, $\infty_3$  |                    |       |                   |
| 6   | 0, 1, 2           | 0     | 0, 1, 2           | 3, 5, 12           | 9     | 12, 14, 6         |
|     | 4, 8, 11          | 14    | 3, 7, 10          | 6, 9, $\infty_1$   | 2     | 8, 11, $\infty_1$ |
|     | 7, 13, $\infty_2$ | 6     | 13, 4, $\infty_2$ | 10, 14, $\infty_3$ | 10    | 5, 9, $\infty_3$  |
| 7   | 0, 1, 2           | 0     | 0, 1, 2           | 3, 5, 10           | 5     | 8, 10, 15         |
|     | 4, 7, 15          | 9     | 13, 16, 6         | 6, 11, 14          | 16    | 4, 9, 12          |
|     | 8, 17, $\infty_1$ | 6     | 14, 5, $\infty_1$ | 9, 13, $\infty_2$  | 8     | 17, 3, $\infty_2$ |
| 8   | 0, 1, 2           | 0     | 0, 1, 2           | 3, 5, 8            | 10    | 13, 15, 18        |
|     | 4, 7, 15          | 2     | 6, 9, 17          | 6, 14, 18          | 19    | 4, 12, 16         |
|     | 9, 13, 19         | 1     | 10, 14, 20        | 10, 16, $\infty_1$ | 16    | 5, 11, $\infty_1$ |
| 9   | 0, 1, 2           | 0     | 0, 1, 2           | 3, 5, 8            | 3     | 6, 8, 11          |
|     | 4, 7, 16          | 11    | 15, 18, 3         | 6, 13, 17          | 4     | 10, 17, 21        |
|     | 9, 18, 23         | 5     | 14, 23, 4         | 10, 14, 20         | 23    | 9, 13, 19         |
| 10  | 0, 1, 2           | 0     | 0, 1, 2           | 3, 5, 8            | 3     | 6, 8, 11          |
|     | 4, 7, 14          | 9     | 13, 16, 23        | 6, 13, 18          | 4     | 10, 17, 22        |
|     | 9, 17, 21         | 25    | 7, 15, 19         | 10, 20, 24         | 21    | 4, 14, 18         |
| 11  | 0, 1, 2           | 0     | 0, 1, 2           | 3, 5, 8            | 2     | 5, 7, 10          |
|     | 4, 7, 11          | 8     | 12, 15, 19        | 6, 17, 22          | 21    | 27, 8, 13         |
|     | 9, 18, 25         | 16    | 25, 4, 11         | 10, 21, 27         | 26    | 6, 17, 23         |
| 12  | 0, 1, 2           | 0     | 0, 1, 2           | 3, 5, 8            | 2     | 5, 7, 10          |
|     | 4, 7, 11          | 8     | 12, 15, 19        | 6, 17, 22          | 21    | 27, 8, 13         |
|     | 9, 18, 25         | 16    | 25, 4, 11         | 10, 21, 27         | 26    | 6, 17, 23         |
| 13  | 0, 1, 2           | 0     | 0, 1, 2           | 3, 5, 8            | 2     | 5, 7, 10          |
|     | 4, 7, 11          | 8     | 12, 15, 19        | 6, 17, 22          | 21    | 27, 8, 13         |
|     | 9, 18, 25         | 16    | 25, 4, 11         | 10, 21, 27         | 26    | 6, 17, 23         |
| 14  | 0, 1, 2           | 0     | 0, 1, 2           | 3, 5, 8            | 2     | 5, 7, 10          |
|     | 4, 7, 11          | 8     | 12, 15, 19        | 6, 17, 22          | 21    | 27, 8, 13         |
|     | 9, 18, 25         | 16    | 25, 4, 11         | 10, 21, 27         | 26    | 6, 17, 23         |
| 15  | 0, 1, 2           | 0     | 0, 1, 2           | 3, 5, 8            | 2     | 5, 7, 10          |
|     | 4, 7, 11          | 8     | 12, 15, 19        | 6, 17, 22          | 21    | 27, 8, 13         |
|     | 9, 18, 25         | 16    | 25, 4, 11         | 10, 21, 27         | 26    | 6, 17, 23         |
| 16  | 0, 1, 2           | 0     | 0, 1, 2           | 3, 5, 8            | 2     | 5, 7, 10          |
|     | 4, 7, 11          | 8     | 12, 15, 19        | 6, 17, 22          | 21    | 27, 8, 13         |
|     | 9, 18, 25         | 16    | 25, 4, 11         | 10, 21, 27         | 26    | 6, 17, 23         |
| 17  | 0, 1, 2           | 0     | 0, 1, 2           | 3, 5, 8            | 2     | 5, 7, 10          |
|     | 4, 7, 11          | 8     | 12, 15, 19        | 6, 17, 22          | 21    | 27, 8, 13         |
|     | 9, 18, 25         | 16    | 25, 4, 11         | 10, 21, 27         | 26    | 6, 17, 23         |
| 18  | 0, 1, 2           | 0     | 0, 1, 2           | 3, 5, 8            | 2     | 5, 7, 10          |
|     | 4, 7, 11          | 8     | 12, 15, 19        | 6, 17, 22          | 21    | 27, 8, 13         |
|     | 9, 18, 25         | 16    | 25, 4, 11         | 10, 21, 27         | 26    | 6, 17, 23         |

Table 9 (Cont.)

| $u$                | Starter            | Adder              | Starter+Adder      | Starter            | Adder              | Starter+Adder      |
|--------------------|--------------------|--------------------|--------------------|--------------------|--------------------|--------------------|
| 19                 | 9, 11, 36          | 0                  | 9, 11, 36          | 2, 42, 48          | 1                  | 3, 43, 49          |
|                    | 6, 22, 32          | 2                  | 8, 24, 34          | 0, 38, 43          | 4                  | 4, 42, 47          |
|                    | 3, 26, 37          | 3                  | 6, 29, 40          | 1, 4, 7            | 6                  | 7, 10, 13          |
|                    | 16, 29, 50         | 30                 | 46, 5, 26          | 14, 47, 51         | 38                 | 52, 31, 35         |
|                    | 12, 31, 35         | 42                 | 0, 19, 23          | 8, 13, 25          | 14                 | 22, 27, 39         |
|                    | 23, 24, 33         | 46                 | 15, 16, 25         | 19, 20, 28         | 25                 | 44, 45, 53         |
|                    | 15, 17, 41         | 51                 | 12, 14, 38         | 5, 18, 40          | 15                 | 20, 33, 1          |
|                    | 10, 34, 49         | 22                 | 32, 2, 17          | 21, 46, 53         | 29                 | 50, 21, 28         |
|                    | 27, 39, $\infty_1$ | 45                 | 18, 30, $\infty_1$ | 30, 44, $\infty_2$ | 7                  | 37, 51, $\infty_2$ |
|                    | 45, 52, $\infty_3$ | 50                 | 41, 48, $\infty_3$ |                    |                    |                    |
| 20                 | 24, 28, 49         | 0                  | 24, 28, 49         | 23, 26, 34         | 3                  | 26, 29, 37         |
|                    | 1, 2, 15           | 1                  | 2, 3, 16           | 13, 20, 52         | 2                  | 15, 22, 54         |
|                    | 12, 17, 43         | 8                  | 20, 25, 51         | 5, 29, 46          | 4                  | 9, 33, 50          |
|                    | 11, 16, 31         | 27                 | 38, 43, 1          | 8, 14, 42          | 49                 | 0, 6, 34           |
|                    | 4, 19, 41          | 48                 | 52, 10, 32         | 0, 40, 48          | 30                 | 30, 13, 21         |
|                    | 10, 22, 33         | 43                 | 53, 8, 19          | 18, 53, 54         | 51                 | 12, 47, 48         |
|                    | 7, 37, 50          | 38                 | 45, 18, 31         | 3, 44, 51          | 52                 | 55, 39, 46         |
|                    | 6, 36, 39          | 5                  | 11, 41, 44         | 9, 38, 56          | 18                 | 27, 56, 17         |
|                    | 21, 25, 27         | 15                 | 36, 40, 42         | 30, 32, $\infty_1$ | 32                 | 5, 7, $\infty_1$   |
|                    | 35, 47, $\infty_3$ | 45                 | 23, 35, $\infty_2$ | 45, 55, $\infty_3$ | 16                 | 4, 14, $\infty_3$  |
| 21                 | 12, 51, 57         | 0                  | 12, 51, 57         | 10, 24, 58         | 1                  | 11, 25, 59         |
|                    | 5, 52, 55          | 3                  | 8, 55, 58          | 3, 22, 44          | 2                  | 5, 24, 46          |
|                    | 16, 21, 27         | 5                  | 21, 26, 32         | 14, 41, 42         | 6                  | 20, 47, 48         |
|                    | 2, 9, 45           | 7                  | 9, 16, 52          | 0, 39, 46          | 4                  | 4, 43, 50          |
|                    | 4, 6, 8            | 36                 | 40, 42, 44         | 1, 33, 37          | 33                 | 34, 6, 10          |
|                    | 20, 50, 53         | 40                 | 0, 30, 33          | 15, 28, 59         | 39                 | 54, 7, 38          |
|                    | 19, 31, 54         | 42                 | 1, 13, 36          | 13, 29, 38         | 24                 | 37, 53, 2          |
|                    | 18, 36, 47         | 27                 | 45, 3, 14          | 7, 17, 25          | 10                 | 17, 27, 35         |
|                    | 11, 26, 49         | 30                 | 41, 56, 19         | 23, 32, 40         | 59                 | 22, 31, 39         |
|                    | 30, 56, $\infty_1$ | 19                 | 49, 15, $\infty_1$ | 34, 35, $\infty_2$ | 54                 | 28, 29, $\infty_2$ |
| 43, 48, $\infty_3$ | 35                 | 18, 23, $\infty_3$ |                    |                    |                    |                    |
| 22                 | 30, 49, 52         | 0                  | 30, 49, 52         | 22, 38, 47         | 1                  | 23, 39, 48         |
|                    | 17, 31, 45         | 2                  | 19, 33, 47         | 0, 35, 62          | 3                  | 3, 38, 2           |
|                    | 12, 23, 27         | 4                  | 16, 27, 31         | 1, 5, 25           | 7                  | 8, 12, 32          |
|                    | 10, 28, 46         | 8                  | 18, 36, 54         | 7, 16, 53          | 27                 | 34, 43, 17         |
|                    | 14, 24, 43         | 60                 | 11, 21, 40         | 11, 36, 48         | 14                 | 25, 50, 62         |
|                    | 9, 39, 40          | 33                 | 42, 9, 10          | 2, 34, 41          | 35                 | 37, 6, 13          |
|                    | 15, 18, 20         | 41                 | 56, 59, 61         | 8, 54, 59          | 55                 | 0, 46, 51          |
|                    | 4, 6, 61           | 22                 | 26, 28, 20         | 3, 33, 55          | 52                 | 55, 22, 44         |
|                    | 13, 26, 60         | 44                 | 57, 7, 41          | 19, 32, 42         | 45                 | 1, 14, 24          |
|                    | 21, 29, 44         | 24                 | 45, 53, 5          | 37, 57, $\infty_1$ | 21                 | 58, 15, $\infty_1$ |
| 50, 56, $\infty_2$ | 42                 | 29, 35, $\infty_2$ | 51, 58, $\infty_3$ | 9                  | 60, 4, $\infty_3$  |                    |
| 23                 | 20, 21, 44         | 0                  | 20, 21, 44         | 7, 37, 54          | 1                  | 8, 38, 55          |
|                    | 23, 28, 53         | 3                  | 26, 31, 56         | 12, 15, 30         | 2                  | 14, 17, 32         |
|                    | 8, 25, 35          | 4                  | 12, 29, 39         | 1, 60, 64          | 5                  | 6, 65, 3           |
|                    | 4, 27, 39          | 6                  | 10, 33, 45         | 3, 11, 17          | 8                  | 11, 19, 25         |
|                    | 9, 36, 49          | 53                 | 62, 23, 36         | 6, 48, 59          | 64                 | 4, 46, 57          |
|                    | 14, 47, 65         | 14                 | 28, 61, 13         | 5, 33, 62          | 19                 | 24, 52, 15         |
|                    | 2, 52, 58          | 49                 | 51, 35, 41         | 0, 31, 40          | 27                 | 27, 58, 1          |
|                    | 13, 34, 45         | 37                 | 50, 5, 16          | 22, 41, 42         | 12                 | 34, 53, 54         |
|                    | 19, 24, 56         | 40                 | 59, 64, 30         | 10, 51, 55         | 33                 | 43, 18, 22         |
|                    | 16, 18, 32         | 31                 | 47, 49, 63         | 26, 38, 46         | 22                 | 48, 60, 2          |
| 29, 57, $\infty_1$ | 46                 | 9, 37, $\infty_1$  | 43, 50, $\infty_2$ | 23                 | 0, 7, $\infty_2$   |                    |
| 61, 63, $\infty_3$ | 45                 | 40, 42, $\infty_3$ |                    |                    |                    |                    |
| 24                 | 16, 28, 44         | 0                  | 16, 28, 44         | 2, 4, 15           | 2                  | 4, 6, 17           |
|                    | 27, 31, 58         | 3                  | 30, 34, 61         | 13, 23, 62         | 1                  | 14, 24, 63         |
|                    | 10, 19, 55         | 10                 | 20, 29, 65         | 1, 45, 51          | 4                  | 5, 49, 55          |
|                    | 11, 12, 32         | 7                  | 18, 19, 39         | 7, 54, 67          | 5                  | 12, 59, 3          |
|                    | 37, 41, 59         | 9                  | 46, 50, 68         | 36, 48, 66         | 18                 | 54, 66, 15         |
|                    | 9, 24, 35          | 34                 | 43, 58, 0          | 5, 38, 64          | 42                 | 47, 11, 37         |
|                    | 30, 33, 47         | 23                 | 53, 56, 1          | 26, 43, 68         | 68                 | 25, 42, 67         |
|                    | 6, 20, 22          | 56                 | 62, 7, 9           | 0, 21, 29          | 31                 | 31, 52, 60         |
|                    | 14, 17, 52         | 65                 | 10, 13, 48         | 3, 8, 40           | 37                 | 40, 45, 8          |
|                    | 18, 25, 53         | 39                 | 57, 64, 23         | 34, 39, 63         | 57                 | 22, 27, 51         |
| 42, 49, 57         | 53                 | 26, 33, 41         | 46, 65, $\infty_1$ | 25                 | 2, 21, $\infty_1$  |                    |
| 50, 56, $\infty_2$ | 51                 | 32, 38, $\infty_2$ | 60, 61, $\infty_3$ | 44                 | 35, 36, $\infty_3$ |                    |
| 25                 | 19, 25, 58         | 0                  | 19, 25, 58         | 5, 20, 71          | 1                  | 6, 21, 0           |
|                    | 28, 41, 43         | 2                  | 30, 43, 45         | 21, 33, 50         | 3                  | 24, 36, 53         |
|                    | 15, 16, 57         | 7                  | 22, 23, 64         | 13, 48, 68         | 13                 | 26, 61, 9          |
|                    | 22, 24, 52         | 5                  | 27, 29, 57         | 17, 27, 49         | 11                 | 28, 38, 60         |
|                    | 14, 26, 30         | 18                 | 32, 44, 48         | 7, 66, 70          | 9                  | 16, 3, 7           |
|                    | 6, 40, 51          | 33                 | 39, 1, 12          | 4, 12, 39          | 38                 | 42, 50, 5          |
|                    | 2, 36, 54          | 67                 | 69, 31, 49         | 1, 29, 47          | 12                 | 13, 41, 59         |
|                    | 11, 18, 34         | 56                 | 67, 2, 18          | 3, 46, 56          | 30                 | 33, 4, 14          |
|                    | 10, 35, 42         | 45                 | 55, 8, 15          | 9, 59, 60          | 47                 | 56, 34, 35         |
|                    | 8, 55, 69          | 57                 | 65, 40, 54         | 0, 31, 67          | 52                 | 52, 11, 47         |
| 23, 32, 37         | 14                 | 37, 46, 51         | 38, 61, 64         | 28                 | 66, 17, 20         |                    |
| 44, 63, $\infty_1$ | 19                 | 63, 10, $\infty_1$ | 45, 53, $\infty_2$ | 17                 | 62, 70, $\infty_2$ |                    |
| 62, 65, $\infty_3$ | 6                  | 68, 71, $\infty_3$ |                    |                    |                    |                    |

Table 9 (Cont.)

| $u$                | Starter            | Adder      | Starter+Adder      | Starter            | Adder      | Starter+Adder      |            |
|--------------------|--------------------|------------|--------------------|--------------------|------------|--------------------|------------|
| 26                 | 33, 45, 71         | 0          | 33, 45, 71         | 31, 52, 70         | 3          | 34, 55, 73         |            |
|                    | 23, 38, 54         | 2          | 25, 40, 56         | 20, 47, 60         | 1          | 21, 48, 61         |            |
|                    | 36, 50, 66         | 8          | 44, 58, 74         | 25, 48, 72         | 4          | 29, 52, 1          |            |
|                    | 29, 44, 62         | 6          | 35, 50, 68         | 27, 46, 68         | 11         | 38, 57, 4          |            |
|                    | 35, 56, 73         | 7          | 42, 63, 5          | 32, 51, 74         | 19         | 51, 70, 18         |            |
|                    | 0, 1, 2            | 12         | 12, 13, 14         | 3, 5, 8            | 57         | 60, 62, 65         |            |
|                    | 4, 7, 11           | 74         | 3, 6, 10           | 6, 10, 15          | 5          | 11, 15, 20         |            |
|                    | 9, 16, 22          | 27         | 36, 43, 49         | 12, 18, 26         | 65         | 2, 8, 16           |            |
|                    | 13, 21, 41         | 18         | 31, 39, 59         | 14, 43, 69         | 32         | 46, 0, 26          |            |
|                    | 17, 49, 61         | 67         | 9, 41, 53          | 19, 55, 65         | 47         | 66, 27, 37         |            |
|                    | 24, 58, 67         | 40         | 64, 23, 32         | 28, 39, 63         | 66         | 19, 30, 54         |            |
|                    | 30, 40, 57         | 42         | 72, 7, 24          | 34, 64, $\infty_1$ | 33         | 67, 22, $\infty_1$ |            |
|                    | 37, 59, $\infty_2$ | 10         | 47, 69, $\infty_2$ | 42, 53, $\infty_3$ | 50         | 17, 28, $\infty_3$ |            |
|                    | 27                 | 36, 55, 56 | 0                  | 36, 55, 56         | 26, 28, 35 | 2                  | 28, 30, 37 |
|                    |                    | 7, 11, 13  | 1                  | 8, 12, 14          | 3, 16, 58  | 3                  | 6, 19, 61  |
|                    |                    | 9, 17, 22  | 4                  | 13, 21, 26         | 6, 15, 51  | 9                  | 15, 24, 60 |
| 14, 21, 39         |                    | 6          | 20, 27, 45         | 12, 30, 44         | 5          | 17, 35, 49         |            |
| 19, 41, 47         |                    | 10         | 29, 51, 57         | 18, 45, 68         | 7          | 25, 52, 75         |            |
| 24, 34, 63         |                    | 49         | 73, 5, 34          | 20, 40, 52         | 27         | 47, 67, 1          |            |
| 31, 43, 74         |                    | 22         | 53, 65, 18         | 23, 53, 64         | 16         | 39, 69, 2          |            |
| 37, 61, 75         |                    | 13         | 50, 74, 10         | 33, 54, 70         | 56         | 11, 32, 48         |            |
| 27, 42, 57         |                    | 67         | 16, 31, 46         | 25, 69, 72         | 47         | 72, 38, 41         |            |
| 0, 8, 62           |                    | 70         | 70, 0, 54          | 1, 2, 76           | 61         | 62, 63, 59         |            |
| 4, 38, 49          |                    | 38         | 42, 76, 9          | 5, 48, 73          | 63         | 68, 33, 58         |            |
| 10, 32, 59         |                    | 12         | 22, 44, 71         | 29, 50, 67         | 14         | 43, 64, 3          |            |
| 46, 65, $\infty_1$ |                    | 20         | 66, 7, $\infty_1$  | 60, 77, $\infty_2$ | 41         | 23, 40, $\infty_2$ |            |
| 66, 71, $\infty_3$ |                    | 11         | 77, 4, $\infty_3$  |                    |            |                    |            |
| 28                 |                    | 10, 19, 48 | 40                 | 50, 59, 7          | 23, 45, 49 | 79                 | 21, 43, 47 |
|                    |                    | 25, 27, 37 | 31                 | 56, 58, 68         | 5, 22, 42  | 64                 | 69, 5, 25  |
|                    | 0, 3, 7            | 39         | 39, 42, 46         | 38, 53, 59         | 24         | 62, 77, 2          |            |
|                    | 15, 16, 73         | 0          | 15, 16, 73         | 14, 28, 46         | 3          | 17, 31, 49         |            |
|                    | 13, 66, 74         | 1          | 14, 67, 75         | 8, 9, 76           | 2          | 10, 11, 78         |            |
|                    | 36, 47, 69         | 5          | 41, 52, 74         | 24, 26, 77         | 4          | 28, 30, 0          |            |
|                    | 12, 31, 60         | 33         | 45, 64, 12         | 1, 6, 57           | 23         | 24, 29, 80         |            |
|                    | 11, 17, 58         | 46         | 57, 63, 23         | 2, 20, 67          | 18         | 20, 38, 4          |            |
|                    | 41, 54, 62         | 25         | 66, 79, 6          | 35, 70, 79         | 20         | 55, 9, 18          |            |
|                    | 34, 39, 65         | 69         | 22, 27, 53         | 29, 32, 68         | 8          | 37, 40, 76         |            |
|                    | 4, 43, 78          | 57         | 61, 19, 54         | 18, 33, 50         | 15         | 33, 48, 65         |            |
|                    | 21, 40, 64         | 49         | 70, 8, 32          | 30, 61, 71         | 54         | 3, 34, 44          |            |
|                    | 44, 55, 80         | 27         | 71, 1, 26          | 51, 63, $\infty_1$ | 9          | 60, 72, $\infty_1$ |            |
|                    | 52, 75, $\infty_3$ | 42         | 13, 36, $\infty_2$ | 56, 72, $\infty_3$ | 60         | 35, 51, $\infty_3$ |            |
|                    | 29                 | 37, 46, 80 | 0                  | 37, 46, 80         | 32, 50, 79 | 2                  | 34, 52, 81 |
|                    |                    | 3, 4, 22   | 1                  | 4, 5, 23           | 2, 81, 82  | 4                  | 6, 1, 2    |
| 10, 12, 36         |                    | 3          | 13, 15, 39         | 8, 53, 78          | 6          | 14, 59, 0          |            |
| 18, 31, 39         |                    | 9          | 27, 40, 48         | 7, 60, 70          | 5          | 12, 65, 75         |            |
| 6, 9, 13           |                    | 11         | 17, 20, 24         | 5, 11, 62          | 14         | 19, 25, 76         |            |
| 17, 47, 69         |                    | 13         | 30, 60, 82         | 16, 24, 57         | 12         | 28, 36, 69         |            |
| 15, 21, 26         |                    | 17         | 32, 38, 43         | 14, 34, 43         | 30         | 44, 64, 73         |            |
| 20, 30, 66         |                    | 36         | 56, 66, 18         | 19, 51, 68         | 49         | 68, 16, 33         |            |
| 28, 52, 63         |                    | 42         | 70, 10, 21         | 23, 49, 71         | 70         | 9, 35, 57          |            |
| 33, 48, 73         |                    | 58         | 7, 22, 47          | 25, 42, 56         | 16         | 41, 58, 72         |            |
| 0, 65, 72          |                    | 61         | 61, 42, 49         | 1, 41, 83          | 54         | 55, 11, 53         |            |
| 27, 61, 74         |                    | 18         | 45, 79, 8          | 29, 45, 75         | 38         | 67, 83, 29         |            |
| 35, 55, 58         |                    | 80         | 31, 51, 54         | 38, 54, 77         | 33         | 71, 3, 26          |            |
| 40, 67, $\infty_1$ |                    | 10         | 50, 77, $\infty_1$ | 44, 59, $\infty_2$ | 19         | 63, 78, $\infty_2$ |            |
| 64, 76, $\infty_3$ |                    | 82         | 62, 74, $\infty_3$ |                    |            |                    |            |
| 30                 |                    | 6, 66, 83  | 36                 | 42, 15, 32         | 18, 59, 73 | 72                 | 3, 44, 58  |
|                    | 12, 28, 47         | 53         | 65, 81, 13         | 34, 70, 82         | 44         | 78, 27, 39         |            |
|                    | 36, 69, 76         | 27         | 63, 9, 16          | 9, 22, 79          | 65         | 74, 0, 57          |            |
|                    | 24, 67, 80         | 32         | 56, 12, 25         | 31, 37, 39         | 55         | 86, 5, 7           |            |
|                    | 7, 10, 15          | 70         | 77, 80, 85         | 2, 25, 35          | 15         | 17, 40, 50         |            |
|                    | 1, 64, 68          | 66         | 67, 43, 47         | 26, 49, 71         | 84         | 23, 46, 68         |            |
|                    | 27, 41, 77         | 11         | 38, 52, 1          | 19, 56, 81         | 10         | 29, 66, 4          |            |
|                    | 20, 44, 55         | 40         | 60, 84, 8          | 16, 50, 65         | 59         | 75, 22, 37         |            |
|                    | 21, 48, 63         | 34         | 55, 82, 10         | 4, 32, 53          | 69         | 73, 14, 35         |            |
|                    | 8, 13, 17          | 28         | 36, 41, 45         | 11, 54, 72         | 17         | 28, 71, 2          |            |
|                    | 3, 42, 62          | 51         | 54, 6, 26          | 14, 30, 33         | 39         | 53, 69, 72         |            |
|                    | 5, 51, 58          | 25         | 30, 76, 83         | 23, 29, 84         | 82         | 18, 24, 79         |            |
|                    | 0, 85, 86          | 21         | 21, 19, 20         | 38, 60, 78         | 60         | 11, 33, 51         |            |
|                    | 40, 52, 61         | 9          | 49, 61, 70         | 43, 74, $\infty_1$ | 75         | 31, 62, $\infty_1$ |            |
|                    | 45, 75, $\infty_2$ | 76         | 34, 64, $\infty_2$ | 46, 57, $\infty_3$ | 2          | 48, 59, $\infty_3$ |            |

Table 9 (Cont.)

| $u$                 | Starter             | Adder              | Starter+Adder       | Starter            | Adder              | Starter+Adder      |
|---------------------|---------------------|--------------------|---------------------|--------------------|--------------------|--------------------|
| 31                  | 7, 9, 85            | 0                  | 7, 9, 85            | 5, 28, 37          | 1                  | 6, 29, 38          |
|                     | 4, 8, 75            | 4                  | 8, 12, 79           | 3, 57, 59          | 2                  | 5, 59, 61          |
|                     | 17, 26, 55          | 5                  | 22, 31, 60          | 13, 51, 67         | 3                  | 16, 54, 70         |
|                     | 11, 64, 84          | 7                  | 18, 71, 1           | 10, 68, 72         | 9                  | 19, 77, 81         |
|                     | 23, 34, 76          | 10                 | 33, 44, 86          | 19, 52, 62         | 6                  | 25, 58, 68         |
|                     | 16, 47, 86          | 8                  | 24, 55, 4           | 15, 21, 70         | 13                 | 28, 34, 83         |
|                     | 53, 58, 63          | 29                 | 82, 87, 2           | 39, 66, 79         | 54                 | 3, 30, 43          |
|                     | 38, 45, 73          | 66                 | 14, 21, 49          | 31, 46, 65         | 38                 | 69, 84, 13         |
|                     | 44, 50, 89          | 28                 | 72, 78, 27          | 33, 49, 80         | 83                 | 26, 42, 73         |
|                     | 27, 48, 77          | 78                 | 15, 36, 65          | 25, 43, 69         | 88                 | 23, 41, 67         |
|                     | 0, 24, 41           | 39                 | 39, 63, 80          | 1, 2, 14           | 50                 | 51, 52, 64         |
|                     | 6, 71, 74           | 56                 | 62, 37, 40          | 12, 78, 81         | 44                 | 56, 32, 35         |
|                     | 18, 29, 36          | 71                 | 89, 10, 17          | 20, 35, 83         | 55                 | 75, 0, 48          |
|                     | 22, 30, 87          | 23                 | 45, 53, 20          | 32, 40, 54         | 34                 | 66, 74, 88         |
|                     | 42, 88, $\infty_1$  | 59                 | 11, 57, $\infty_1$  | 56, 82, $\infty_2$ | 84                 | 50, 76, $\infty_2$ |
|                     | 60, 61, $\infty_3$  | 76                 | 46, 47, $\infty_3$  |                    |                    |                    |
|                     | 32                  | 4, 7, 11           | 78                  | 82, 85, 89         | 0, 1, 2            | 69                 |
| 25, 60, 80          |                     | 90                 | 22, 57, 77          | 17, 39, 47         | 58                 | 75, 4, 12          |
| 33, 46, 85          |                     | 66                 | 6, 19, 58           | 38, 53, 88         | 60                 | 5, 20, 55          |
| 40, 65, 90          |                     | 51                 | 91, 23, 48          | 32, 51, 83         | 5                  | 37, 56, 88         |
| 42, 68, 91          |                     | 86                 | 35, 61, 84          | 3, 5, 8            | 87                 | 90, 92, 2          |
| 13, 22, 79          |                     | 81                 | 1, 10, 67           | 45, 64, 82         | 19                 | 64, 83, 8          |
| 36, 70, 92          |                     | 73                 | 16, 50, 72          | 37, 63, 84         | 63                 | 7, 33, 54          |
| 35, 56, 89          |                     | 30                 | 65, 86, 26          | 12, 48, 77         | 56                 | 68, 11, 40         |
| 27, 54, 69          |                     | 12                 | 39, 66, 81          | 41, 58, 74         | 2                  | 43, 60, 76         |
| 29, 52, 76          |                     | 79                 | 15, 38, 62          | 23, 55, 67         | 70                 | 0, 32, 44          |
| 6, 10, 15           |                     | 36                 | 42, 46, 51          | 14, 24, 87         | 35                 | 49, 59, 29         |
| 31, 59, 71          |                     | 75                 | 13, 41, 53          | 9, 16, 57          | 64                 | 73, 80, 28         |
| 44, 62, 78          |                     | 67                 | 18, 36, 52          | 18, 28, 73         | 6                  | 24, 34, 79         |
| 19, 30, 43          |                     | 44                 | 63, 74, 87          | 20, 26, 34         | 76                 | 3, 9, 17           |
| 21, 50, 61          |                     | 57                 | 78, 14, 25          | 49, 66, $\infty_1$ | 74                 | 30, 47, $\infty_1$ |
| 72, 86, $\infty_2$  |                     | 52                 | 31, 45, $\infty_2$  | 75, 81, $\infty_3$ | 39                 | 21, 27, $\infty_3$ |
| 34                  |                     | 37, 45, 68         | 38                  | 75, 83, 7          | 2, 51, 66          | 15                 |
|                     | 9, 21, 88           | 42                 | 51, 63, 31          | 24, 55, 77         | 19                 | 43, 74, 96         |
|                     | 25, 67, 86          | 70                 | 95, 38, 57          | 23, 48, 64         | 21                 | 44, 69, 85         |
|                     | 49, 63, 90          | 86                 | 36, 50, 77          | 44, 61, 80         | 17                 | 61, 78, 97         |
|                     | 42, 89, 97          | 28                 | 70, 18, 26          | 46, 81, 92         | 30                 | 76, 12, 23         |
|                     | 43, 70, 98          | 48                 | 91, 19, 47          | 0, 69, 74          | 33                 | 33, 3, 8           |
|                     | 27, 53, 87          | 67                 | 94, 21, 55          | 17, 35, 78         | 69                 | 86, 5, 48          |
|                     | 8, 56, 79           | 52                 | 60, 9, 32           | 41, 65, 91         | 98                 | 40, 64, 90         |
|                     | 40, 57, 94          | 58                 | 98, 16, 53          | 1, 4, 11           | 61                 | 62, 65, 72         |
|                     | 16, 26, 30          | 11                 | 27, 37, 41          | 6, 7, 12           | 8                  | 14, 15, 20         |
|                     | 3, 5, 95            | 77                 | 80, 82, 73          | 10, 19, 62         | 93                 | 4, 13, 56          |
|                     | 31, 47, 60          | 97                 | 29, 45, 58          | 29, 32, 50         | 60                 | 89, 92, 11         |
|                     | 20, 59, 71          | 29                 | 49, 88, 1           | 22, 54, 58         | 87                 | 10, 42, 46         |
|                     | 13, 28, 34          | 71                 | 84, 0, 6            | 14, 36, 76         | 57                 | 71, 93, 34         |
|                     | 15, 84, 85          | 39                 | 54, 24, 25          | 18, 38, 83         | 83                 | 2, 22, 67          |
|                     | 33, 73, 75          | 54                 | 87, 28, 30          | 39, 52, $\infty_1$ | 0                  | 39, 52, $\infty_1$ |
|                     | 72, 96, $\infty_2$  | 62                 | 35, 59, $\infty_2$  | 82, 93, $\infty_3$ | 85                 | 68, 79, $\infty_3$ |
| 35                  | 37, 62, 78          | 49                 | 86, 9, 25           | 23, 55, 81         | 38                 | 61, 93, 17         |
|                     | 16, 36, 101         | 56                 | 72, 92, 55          | 19, 88, 92         | 80                 | 99, 66, 70         |
|                     | 0, 49, 91           | 95                 | 95, 42, 84          | 5, 12, 24          | 98                 | 1, 8, 20           |
|                     | 33, 35, 79          | 67                 | 100, 0, 44          | 11, 82, 83         | 24                 | 35, 4, 5           |
|                     | 20, 41, 48          | 76                 | 96, 15, 22          | 21, 54, 59         | 66                 | 87, 18, 23         |
|                     | 38, 51, 75          | 75                 | 11, 24, 48          | 25, 60, 76         | 21                 | 46, 81, 97         |
|                     | 22, 52, 97          | 99                 | 19, 49, 94          | 17, 26, 34         | 13                 | 30, 39, 47         |
|                     | 50, 64, 86          | 48                 | 98, 10, 32          | 1, 9, 10           | 59                 | 60, 68, 69         |
|                     | 13, 18, 61          | 27                 | 40, 45, 88          | 28, 43, 90         | 39                 | 67, 82, 27         |
|                     | 27, 66, 89          | 87                 | 12, 51, 74          | 30, 40, 85         | 43                 | 73, 83, 26         |
|                     | 15, 67, 99          | 93                 | 6, 58, 90           | 2, 8, 98           | 83                 | 85, 91, 79         |
|                     | 4, 6, 77            | 58                 | 62, 64, 33          | 7, 63, 74          | 82                 | 89, 43, 54         |
|                     | 14, 39, 53          | 62                 | 76, 101, 13         | 3, 69, 95          | 35                 | 38, 2, 28          |
|                     | 29, 32, 70          | 5                  | 34, 37, 75          | 42, 46, 94         | 11                 | 53, 57, 3          |
|                     | 44, 47, 65          | 12                 | 56, 59, 77          | 45, 68, 87         | 86                 | 29, 52, 71         |
|                     | 31, 58, 80          | 85                 | 14, 41, 63          | 56, 71, 84         | 96                 | 50, 65, 78         |
|                     | 57, 100, $\infty_1$ | 23                 | 80, 21, $\infty_1$  | 72, 96, $\infty_2$ | 37                 | 7, 31, $\infty_2$  |
| 73, 93, $\infty_3$  | 45                  | 16, 36, $\infty_3$ |                     |                    |                    |                    |
| 38                  | 32, 101, 109        | 97                 | 18, 87, 95          | 22, 35, 87         | 67                 | 89, 102, 43        |
|                     | 6, 8, 11            | 13                 | 19, 21, 24          | 24, 62, 77         | 81                 | 105, 32, 47        |
|                     | 36, 50, 54          | 47                 | 83, 97, 101         | 29, 73, 95         | 39                 | 68, 1, 23          |
|                     | 10, 31, 34          | 38                 | 48, 69, 72          | 9, 39, 56          | 61                 | 70, 100, 6         |
|                     | 51, 76, 99          | 63                 | 3, 28, 51           | 19, 28, 38         | 6                  | 25, 34, 44         |
|                     | 14, 66, 102         | 22                 | 36, 88, 13          | 5, 92, 96          | 74                 | 79, 55, 59         |
|                     | 18, 45, 78          | 86                 | 104, 20, 53         | 55, 71, 110        | 27                 | 82, 98, 26         |
|                     | 27, 41, 103         | 8                  | 35, 49, 0           | 25, 65, 97         | 68                 | 93, 22, 54         |
|                     | 43, 68, 85          | 106                | 38, 63, 80          | 48, 67, 89         | 29                 | 77, 96, 7          |
|                     | 33, 91, 106         | 76                 | 109, 56, 71         | 15, 49, 60         | 59                 | 74, 108, 8         |
|                     | 2, 4, 30            | 62                 | 64, 66, 92          | 42, 47, 90         | 78                 | 9, 14, 57          |
|                     | 46, 52, 79          | 15                 | 61, 67, 94          | 12, 21, 88         | 64                 | 76, 85, 41         |
|                     | 20, 74, 100         | 95                 | 4, 58, 84           | 17, 72, 82         | 104                | 10, 65, 75         |
|                     | 26, 57, 107         | 3                  | 29, 60, 110         | 40, 69, 81         | 82                 | 11, 40, 52         |
|                     | 3, 16, 23           | 100                | 103, 5, 12          | 0, 1, 7            | 30                 | 30, 31, 37         |
|                     | 44, 80, 98          | 46                 | 90, 15, 33          | 37, 84, 105        | 2                  | 39, 86, 107        |
|                     | 13, 63, 64          | 93                 | 106, 45, 46         | 53, 61, 93         | 20                 | 73, 81, 2          |
| 58, 70, 86          | 103                 | 50, 62, 78         | 59, 108, $\infty_1$ | 94                 | 42, 91, $\infty_1$ |                    |
| 75, 104, $\infty_2$ | 24                  | 99, 17, $\infty_2$ | 83, 94, $\infty_3$  | 44                 | 16, 27, $\infty_3$ |                    |

Table 10  $(S, C, R)$  and  $A$  for  $(1, 2; 3)$ -frames of types  $(3h)^u(3\ell)^l$ 

|                        |       |                        |                         |                                             |                         |  |
|------------------------|-------|------------------------|-------------------------|---------------------------------------------|-------------------------|--|
| C                      |       | R                      |                         | A $(1, 2; 3)$ -frame of type $12^9 18^1$    |                         |  |
| 4, 6, 11               |       | 32, 61, 93             |                         |                                             |                         |  |
| 8, 12, 16              |       | 38, 69, 100            |                         |                                             |                         |  |
| 17, 30, 43             |       | 25, 48, 68             |                         |                                             |                         |  |
| 22, 41, 66             |       | 19, 33, 47             |                         |                                             |                         |  |
| 29, 51, 79             |       | 31, 60, 83             |                         |                                             |                         |  |
| 35, 67, 102            |       | 7, 14, 24              |                         |                                             |                         |  |
| Starter                | Adder | Starter+ Adder         | Starter                 | Adder                                       | Starter + Adder         |  |
| 33, 73, 88             | 1     | 34, 74, 89             | 28, 58, 74              | 12                                          | 40, 70, 86              |  |
| 25, 65, 76             | 19    | 44, 84, 95             | 24, 61, 71              | 4                                           | 28, 65, 75              |  |
| 23, 26, 42             | 16    | 39, 42, 58             | 48, 69, 107             | 2                                           | 50, 71, 1               |  |
| 37, 70, 92             | 6     | 43, 76, 98             | 47, 80, 105             | 5                                           | 52, 85, 2               |  |
| 44, 59, 100            | 7     | 51, 66, 107            | 1, 2, 3                 | 3                                           | 4, 5, 6                 |  |
| 5, 53, 56              | 11    | 16, 64, 67             | 7, 31, 91               | 10                                          | 17, 41, 101             |  |
| 10, 15, 21             | 82    | 92, 97, 103            | 13, 84, 104             | 83                                          | 96, 59, 79              |  |
| 14, 101, $\infty_1$    | 64    | 78, 57, $\infty_1$     | 19, 93, $\infty_2$      | 37                                          | 56, 22, $\infty_2$      |  |
| 20, 86, $\infty_3$     | 71    | 91, 49, $\infty_3$     | 32, 98, $\infty_4$      | 97                                          | 21, 87, $\infty_4$      |  |
| 34, 78, $\infty_5$     | 60    | 94, 30, $\infty_5$     | 40, 46, $\infty_6$      | 65                                          | 105, 3, $\infty_6$      |  |
| 50, 89, $\infty_7$     | 32    | 82, 13, $\infty_7$     | 52, 64, $\infty_8$      | 67                                          | 11, 23, $\infty_8$      |  |
| 62, 96, $\infty_9$     | 58    | 12, 46, $\infty_9$     | 75, 83, $\infty_{10}$   | 62                                          | 29, 37, $\infty_{10}$   |  |
| 77, 103, $\infty_{11}$ | 93    | 62, 88, $\infty_{11}$  | 85, 97, $\infty_{12}$   | 21                                          | 106, 10, $\infty_{12}$  |  |
| 60, 95, $\infty_{13}$  | 68    | 20, 55, $\infty_{13}$  | 57, 106, $\infty_{14}$  | 104                                         | 53, 102, $\infty_{14}$  |  |
| 55, 94, $\infty_{15}$  | 22    | 77, 8, $\infty_{15}$   | 49, 87, $\infty_{16}$   | 94                                          | 35, 73, $\infty_{16}$   |  |
| 39, 82, $\infty_{17}$  | 41    | 80, 15, $\infty_{17}$  | 38, 68, $\infty_{18}$   | 66                                          | 104, 26, $\infty_{18}$  |  |
| C                      |       | R                      |                         | A $(1, 2; 3)$ -frame of type $12^9 21^1$    |                         |  |
| 4, 6, 11               |       | 38, 69, 100            |                         |                                             |                         |  |
| 8, 12, 16              |       | 25, 48, 68             |                         |                                             |                         |  |
| 17, 30, 43             |       | 19, 33, 47             |                         |                                             |                         |  |
| 22, 41, 66             |       | 31, 60, 83             |                         |                                             |                         |  |
| 29, 51, 79             |       | 7, 14, 24              |                         |                                             |                         |  |
| 35, 67, 102            |       | 15, 26, 34             |                         |                                             |                         |  |
| 32, 61, 93             |       | 28, 50, 75             |                         |                                             |                         |  |
| Starter                | Adder | Starter+ Adder         | Starter                 | Adder                                       | Starter + Adder         |  |
| 21, 58, 91             | 1     | 22, 59, 92             | 15, 31, 71              | 6                                           | 21, 37, 77              |  |
| 14, 25, 40             | 15    | 29, 40, 55             | 7, 13, 19               | 4                                           | 11, 17, 23              |  |
| 5, 10, 20              | 41    | 46, 51, 61             | 37, 92, 104             | 2                                           | 39, 94, 106             |  |
| 34, 74, 98             | 22    | 56, 96, 12             | 33, 53, 83              | 20                                          | 53, 73, 103             |  |
| 28, 44, 65             | 13    | 41, 57, 78             | 23, 26, 47              | 39                                          | 62, 65, 86              |  |
| 1, 75, 76              | 12    | 13, 87, 88             | 2, 64, $\infty_1$       | 3                                           | 5, 67, $\infty_1$       |  |
| 3, 62, $\infty_2$      | 17    | 20, 79, $\infty_2$     | 24, 77, $\infty_3$      | 47                                          | 71, 16, $\infty_3$      |  |
| 42, 84, $\infty_4$     | 32    | 74, 8, $\infty_4$      | 46, 97, $\infty_5$      | 106                                         | 44, 95, $\infty_5$      |  |
| 48, 96, $\infty_6$     | 61    | 1, 49, $\infty_6$      | 50, 89, $\infty_7$      | 8                                           | 58, 97, $\infty_7$      |  |
| 52, 100, $\infty_8$    | 14    | 66, 6, $\infty_8$      | 56, 107, $\infty_9$     | 33                                          | 89, 32, $\infty_9$      |  |
| 59, 101, $\infty_{10}$ | 92    | 43, 85, $\infty_{10}$  | 69, 103, $\infty_{11}$  | 69                                          | 30, 64, $\infty_{11}$   |  |
| 70, 73, $\infty_{12}$  | 28    | 98, 101, $\infty_{12}$ | 78, 80, $\infty_{13}$   | 24                                          | 102, 104, $\infty_{13}$ |  |
| 85, 86, $\infty_{14}$  | 25    | 2, 3, $\infty_{14}$    | 88, 105, $\infty_{15}$  | 96                                          | 76, 93, $\infty_{15}$   |  |
| 60, 95, $\infty_{16}$  | 10    | 70, 105, $\infty_{16}$ | 57, 106, $\infty_{17}$  | 86                                          | 35, 84, $\infty_{17}$   |  |
| 55, 94, $\infty_{18}$  | 105   | 52, 91, $\infty_{18}$  | 49, 87, $\infty_{19}$   | 31                                          | 80, 10, $\infty_{19}$   |  |
| 39, 82, $\infty_{20}$  | 68    | 107, 42, $\infty_{20}$ | 38, 68, $\infty_{21}$   | 44                                          | 82, 4, $\infty_{21}$    |  |
| C                      |       | R                      |                         | A $(1, 2; 3)$ -frame of type $12^{10} 18^1$ |                         |  |
| 4, 6, 11               |       | 8, 15, 31              |                         |                                             |                         |  |
| 5, 9, 13               |       | 18, 32, 49             |                         |                                             |                         |  |
| 17, 34, 48             |       | 26, 54, 88             |                         |                                             |                         |  |
| 21, 43, 65             |       | 35, 67, 102            |                         |                                             |                         |  |
| 25, 53, 78             |       | 36, 68, 109            |                         |                                             |                         |  |
| 27, 56, 85             |       | 37, 72, 119            |                         |                                             |                         |  |
| Starter                | Adder | Starter+ Adder         | Starter                 | Adder                                       | Starter + Adder         |  |
| 22, 33, 87             | 5     | 27, 38, 92             | 18, 24, 36              | 15                                          | 33, 39, 51              |  |
| 16, 19, 64             | 9     | 25, 28, 73             | 39, 66, 111             | 3                                           | 42, 69, 114             |  |
| 38, 62, 101            | 14    | 52, 76, 115            | 35, 76, 113             | 8                                           | 43, 84, 1               |  |
| 32, 51, 93             | 2     | 34, 53, 95             | 31, 47, 99              | 17                                          | 48, 64, 116             |  |
| 7, 12, 15              | 4     | 11, 16, 19             | 8, 14, 23               | 33                                          | 41, 47, 56              |  |
| 55, 91, 116            | 6     | 61, 97, 2              | 44, 71, 115             | 11                                          | 55, 82, 6               |  |
| 41, 74, 112            | 22    | 63, 96, 14             | 26, 37, 52              | 49                                          | 75, 86, 101             |  |
| 29, 42, 63             | 16    | 45, 58, 79             | 49, 82, 118             | 25                                          | 74, 107, 23             |  |
| 45, 88, 114            | 97    | 22, 65, 91             | 1, 2, 57                | 76                                          | 77, 78, 13              |  |
| 3, 59, $\infty_1$      | 82    | 85, 21, $\infty_1$     | 28, 94, $\infty_2$      | 38                                          | 66, 12, $\infty_2$      |  |
| 46, 89, $\infty_3$     | 77    | 3, 46, $\infty_3$      | 54, 117, $\infty_4$     | 27                                          | 81, 24, $\infty_4$      |  |
| 58, 77, $\infty_5$     | 47    | 105, 4, $\infty_5$     | 61, 107, $\infty_6$     | 1                                           | 62, 108, $\infty_6$     |  |
| 67, 104, $\infty_7$    | 45    | 112, 29, $\infty_7$    | 68, 86, $\infty_8$      | 43                                          | 111, 9, $\infty_8$      |  |
| 69, 108, $\infty_9$    | 95    | 44, 83, $\infty_9$     | 72, 84, $\infty_{10}$   | 107                                         | 59, 71, $\infty_{10}$   |  |
| 73, 119, $\infty_{11}$ | 104   | 57, 103, $\infty_{11}$ | 75, 98, $\infty_{12}$   | 19                                          | 94, 117, $\infty_{12}$  |  |
| 79, 103, $\infty_{13}$ | 34    | 113, 17, $\infty_{13}$ | 81, 102, $\infty_{14}$  | 23                                          | 104, 5, $\infty_{14}$   |  |
| 83, 92, $\infty_{15}$  | 35    | 118, 7, $\infty_{15}$  | 95, 97, $\infty_{16}$   | 112                                         | 87, 89, $\infty_{16}$   |  |
| 96, 109, $\infty_{17}$ | 117   | 93, 106, $\infty_{17}$ | 105, 106, $\infty_{18}$ | 113                                         | 98, 99, $\infty_{18}$   |  |

Table 10 (Cont.)

| C                      |       | R                      |                         | A (1,2;3)-frame of type $12^{10}21^1$ |                         |  |
|------------------------|-------|------------------------|-------------------------|---------------------------------------|-------------------------|--|
| 4,6,11                 |       | 18,32,49               |                         |                                       |                         |  |
| 5,9,13                 |       | 26,54,88               |                         |                                       |                         |  |
| 17,34,48               |       | 35,67,102              |                         |                                       |                         |  |
| 21,43,65               |       | 36,68,109              |                         |                                       |                         |  |
| 25,53,78               |       | 37,72,119              |                         |                                       |                         |  |
| 27,56,85               |       | 14,22,33               |                         |                                       |                         |  |
| 8,15,31                |       | 28,62,99               |                         |                                       |                         |  |
| Starter                | Adder | Starter+ Adder         | Starter                 | Adder                                 | Starter + Adder         |  |
| 29, 47, 95             | 9     | 38, 56, 104            | 28, 44, 67              | 11                                    | 39, 55, 78              |  |
| 26, 38, 82             | 3     | 29, 41, 85             | 24, 36, 37              | 7                                     | 31, 43, 44              |  |
| 18, 33, 42             | 24    | 42, 57, 66             | 45, 83, 104             | 1                                     | 46, 84, 105             |  |
| 41, 87, 106            | 6     | 47, 93, 112            | 39, 63, 105             | 12                                    | 51, 75, 117             |  |
| 35, 68, 114            | 13    | 48, 81, 7              | 32, 59, 77              | 2                                     | 34, 61, 79              |  |
| 49, 86, 112            | 25    | 74, 111, 17            | 46, 94, 115             | 78                                    | 4, 52, 73               |  |
| 1, 2, 7                | 4     | 5, 6, 11               | 12, 14, 69              | 75                                    | 87, 89, 24              |  |
| 16, 19, 22             | 76    | 92, 95, 98             | 23, 72, $\infty_1$      | 22                                    | 45, 94, $\infty_1$      |  |
| 51, 103, $\infty_2$    | 18    | 69, 1, $\infty_2$      | 54, 96, $\infty_3$      | 43                                    | 97, 19, $\infty_3$      |  |
| 55, 119, $\infty_4$    | 92    | 27, 91, $\infty_4$     | 57, 93, $\infty_5$      | 8                                     | 65, 101, $\infty_5$     |  |
| 61, 113, $\infty_6$    | 16    | 77, 9, $\infty_6$      | 62, 101, $\infty_7$     | 14                                    | 76, 115, $\infty_7$     |  |
| 66, 102, $\infty_8$    | 77    | 23, 59, $\infty_8$     | 71, 98, $\infty_9$      | 35                                    | 106, 13, $\infty_9$     |  |
| 75, 108, $\infty_{10}$ | 28    | 103, 16, $\infty_{10}$ | 76, 89, $\infty_{11}$   | 46                                    | 2, 15, $\infty_{11}$    |  |
| 79, 88, $\infty_{12}$  | 44    | 3, 12, $\infty_{12}$   | 81, 92, $\infty_{13}$   | 26                                    | 107, 118, $\infty_{13}$ |  |
| 84, 99, $\infty_{14}$  | 29    | 113, 8, $\infty_{14}$  | 91, 116, $\infty_{15}$  | 87                                    | 58, 83, $\infty_{15}$   |  |
| 64, 107, $\infty_{16}$ | 109   | 53, 96, $\infty_{16}$  | 74, 117, $\infty_{17}$  | 67                                    | 21, 64, $\infty_{17}$   |  |
| 73, 118, $\infty_{18}$ | 118   | 71, 116, $\infty_{18}$ | 58, 109, $\infty_{19}$  | 5                                     | 63, 114, $\infty_{19}$  |  |
| 52, 111, $\infty_{20}$ | 34    | 86, 25, $\infty_{20}$  | 3, 97, $\infty_{21}$    | 105                                   | 108, 82, $\infty_{21}$  |  |
| C                      |       | R                      |                         | A (1,2;3)-frame of type $12^{11}15^1$ |                         |  |
| 4,6,14                 |       | 37,74,117              |                         |                                       |                         |  |
| 7,12,17                |       | 27,56,85               |                         |                                       |                         |  |
| 16,32,48               |       | 38,75,118              |                         |                                       |                         |  |
| 20,39,58               |       | 34,69,107              |                         |                                       |                         |  |
| 25,51,83               |       | 18,35,49               |                         |                                       |                         |  |
| Starter                | Adder | Starter+ Adder         | Starter                 | Adder                                 | Starter + Adder         |  |
| 41, 71, 116            | 84    | 125, 23, 68            | 38, 62, 111             | 25                                    | 63, 87, 4               |  |
| 65, 92, 122            | 93    | 26, 53, 83             | 43, 69, 94              | 58                                    | 101, 127, 20            |  |
| 34, 40, 47             | 5     | 39, 45, 52             | 1, 2, 98                | 128                                   | 129, 130, 94            |  |
| 3, 108, 120            | 37    | 40, 13, 25             | 13, 54, 74              | 19                                    | 32, 73, 93              |  |
| 30, 97, 117            | 17    | 47, 114, 2             | 52, 80, 128             | 68                                    | 120, 16, 64             |  |
| 31, 85, 127            | 48    | 79, 1, 43              | 8, 21, 23               | 63                                    | 71, 84, 86              |  |
| 37, 129, 130           | 105   | 10, 102, 103           | 46, 49, 113             | 60                                    | 106, 109, 41            |  |
| 64, 95, 103            | 28    | 92, 123, 131           | 27, 50, 96              | 45                                    | 72, 95, 9               |  |
| 28, 42, 90             | 109   | 5, 19, 67              | 10, 19, 70              | 41                                    | 51, 60, 111             |  |
| 15, 18, 24             | 6     | 21, 24, 30             | 5, 9, 26                | 52                                    | 57, 61, 78              |  |
| 59, 82, 106            | 131   | 58, 81, 105            | 35, 89, 114             | 24                                    | 59, 113, 6              |  |
| 36, 86, 107            | 53    | 89, 7, 28              | 29, 101, 105            | 7                                     | 36, 108, 112            |  |
| 45, 63, 91             | 35    | 80, 98, 126            | 53, 87, $\infty_1$      | 62                                    | 115, 17, $\infty_1$     |  |
| 56, 124, $\infty_2$    | 20    | 76, 12, $\infty_2$     | 61, 123, $\infty_3$     | 1                                     | 62, 124, $\infty_3$     |  |
| 67, 79, $\infty_4$     | 49    | 116, 128, $\infty_4$   | 73, 126, $\infty_5$     | 9                                     | 82, 3, $\infty_5$       |  |
| 78, 119, $\infty_6$    | 83    | 29, 70, $\infty_6$     | 81, 115, $\infty_7$     | 82                                    | 31, 65, $\infty_7$      |  |
| 84, 102, $\infty_8$    | 38    | 122, 8, $\infty_8$     | 93, 100, $\infty_9$     | 4                                     | 97, 104, $\infty_9$     |  |
| 76, 118, $\infty_{10}$ | 104   | 48, 90, $\infty_{10}$  | 75, 125, $\infty_{11}$  | 103                                   | 46, 96, $\infty_{11}$   |  |
| 72, 112, $\infty_{12}$ | 74    | 14, 54, $\infty_{12}$  | 68, 131, $\infty_{13}$  | 51                                    | 119, 50, $\infty_{13}$  |  |
| 60, 109, $\infty_{14}$ | 114   | 42, 91, $\infty_{14}$  | 57, 104, $\infty_{15}$  | 43                                    | 100, 15, $\infty_{15}$  |  |
| C                      |       | R                      |                         | A (1,2;3)-frame of type $12^{11}18^1$ |                         |  |
| 4,6,14                 |       | 27,56,85               |                         |                                       |                         |  |
| 7,12,17                |       | 38,75,118              |                         |                                       |                         |  |
| 16,32,48               |       | 34,69,107              |                         |                                       |                         |  |
| 20,39,58               |       | 18,35,49               |                         |                                       |                         |  |
| 25,51,83               |       | 31,59,93               |                         |                                       |                         |  |
| 37,74,117              |       | 40,81,122              |                         |                                       |                         |  |
| Starter                | Adder | Starter+ Adder         | Starter                 | Adder                                 | Starter + Adder         |  |
| 36, 56, 120            | 5     | 41, 61, 125            | 35, 81, 106             | 2                                     | 37, 83, 108             |  |
| 64, 70, 127            | 1     | 65, 71, 128            | 42, 95, 115             | 8                                     | 50, 103, 123            |  |
| 46, 69, 97             | 7     | 53, 76, 104            | 45, 94, 129             | 6                                     | 51, 100, 3              |  |
| 63, 90, 130            | 4     | 67, 94, 2              | 49, 73, 124             | 9                                     | 58, 82, 1               |  |
| 62, 98, 122            | 16    | 78, 114, 6             | 59, 93, 123             | 3                                     | 62, 96, 126             |  |
| 52, 82, 105            | 34    | 86, 116, 7             | 50, 86, 128             | 20                                    | 70, 106, 16             |  |
| 1, 2, 3                | 12    | 13, 14, 15             | 5, 8, 23                | 24                                    | 29, 32, 47              |  |
| 9, 13, 21              | 15    | 24, 28, 36             | 10, 19, 28              | 29                                    | 39, 48, 57              |  |
| 15, 18, 30             | 72    | 87, 90, 102            | 24, 31, 38              | 60                                    | 84, 91, 98              |  |
| 26, 43, 119            | 17    | 43, 60, 4              | 27, 87, 114             | 90                                    | 117, 45, 72             |  |
| 29, 54, 116            | 35    | 64, 89, 19             | 34, 80, 101             | 40                                    | 74, 120, 9              |  |
| 40, 111, $\infty_1$    | 89    | 129, 68, $\infty_1$    | 41, 67, $\infty_2$      | 86                                    | 127, 21, $\infty_2$     |  |
| 47, 103, $\infty_3$    | 83    | 130, 54, $\infty_3$    | 53, 107, $\infty_4$     | 104                                   | 25, 79, $\infty_4$      |  |
| 61, 100, $\infty_5$    | 52    | 113, 20, $\infty_5$    | 65, 96, $\infty_6$      | 109                                   | 42, 73, $\infty_6$      |  |
| 71, 84, $\infty_7$     | 53    | 124, 5, $\infty_7$     | 78, 91, $\infty_8$      | 64                                    | 10, 23, $\infty_8$      |  |
| 79, 126, $\infty_9$    | 18    | 97, 12, $\infty_9$     | 85, 89, $\infty_{10}$   | 26                                    | 111, 115, $\infty_{10}$ |  |
| 92, 113, $\infty_{11}$ | 27    | 119, 8, $\infty_{11}$  | 102, 108, $\infty_{12}$ | 125                                   | 95, 101, $\infty_{12}$  |  |
| 76, 118, $\infty_{13}$ | 119   | 63, 105, $\infty_{13}$ | 75, 125, $\infty_{14}$  | 37                                    | 112, 30, $\infty_{14}$  |  |
| 72, 112, $\infty_{15}$ | 112   | 52, 92, $\infty_{15}$  | 68, 131, $\infty_{16}$  | 81                                    | 17, 80, $\infty_{16}$   |  |
| 60, 109, $\infty_{17}$ | 49    | 109, 26, $\infty_{17}$ | 57, 104, $\infty_{18}$  | 74                                    | 131, 46, $\infty_{18}$  |  |

Table 10 (Cont.)

| C                      |       | R                      |                        | A (1,2;3)-frame of type $12^{11}21^1$ |                        |  |
|------------------------|-------|------------------------|------------------------|---------------------------------------|------------------------|--|
| 4,6,14                 |       | 38,75,118              |                        |                                       |                        |  |
| 7,12,17                |       | 34,69,107              |                        |                                       |                        |  |
| 16,32,48               |       | 18,35,49               |                        |                                       |                        |  |
| 20,39,58               |       | 31,59,93               |                        |                                       |                        |  |
| 25,51,83               |       | 40,81,122              |                        |                                       |                        |  |
| 37,74,117              |       | 5,9,13                 |                        |                                       |                        |  |
| 27,56,85               |       | 10,23,30               |                        |                                       |                        |  |
| Starter                | Adder | Starter+ Adder         | Starter                | Adder                                 | Starter + Adder        |  |
| 29,94,114              | 3     | 32,97,117              | 24,30,105              | 15                                    | 39,45,120              |  |
| 21,28,42               | 8     | 29,36,50               | 13,26,38               | 30                                    | 43,56,68               |  |
| 10,19,31               | 6     | 16,25,37               | 41,95,120              | 5                                     | 46,100,125             |  |
| 40,63,111              | 1     | 41,64,112              | 36,62,108              | 16                                    | 52,78,124              |  |
| 35,59,86               | 12    | 4,71,98                | 34,52,79               | 24                                    | 58,76,103              |  |
| 50,89,113              | 13    | 63,102,126             | 43,73,115              | 14                                    | 57,87,129              |  |
| 54,90,130              | 19    | 73,109,17              | 53,98,129              | 7                                     | 60,105,4               |  |
| 46,80,116              | 28    | 74,108,12              | 45,93,123              | 35                                    | 80,128,26              |  |
| 1,2,3                  | 18    | 19,20,21               | 5,8,69                 | 46                                    | 51,54,115              |  |
| 9,18,82                | 129   | 6,15,79                | 15,64, $\infty_1$      | 47                                    | 62,111, $\infty_1$     |  |
| 23,127, $\infty_2$     | 90    | 113,85, $\infty_2$     | 47,70, $\infty_3$      | 57                                    | 104,127, $\infty_3$    |  |
| 49,102, $\infty_4$     | 91    | 8,61, $\infty_4$       | 61,128, $\infty_5$     | 69                                    | 130,65, $\infty_5$     |  |
| 65,122, $\infty_6$     | 94    | 27,84, $\infty_6$      | 67,84, $\infty_7$      | 39                                    | 106,123, $\infty_7$    |  |
| 71,106, $\infty_8$     | 68    | 7,42, $\infty_8$       | 78,124, $\infty_9$     | 102                                   | 48,94, $\infty_9$      |  |
| 81,96, $\infty_{10}$   | 20    | 101,116, $\infty_{10}$ | 87,126, $\infty_{11}$  | 98                                    | 53,92, $\infty_{11}$   |  |
| 91,97, $\infty_{12}$   | 124   | 83,89, $\infty_{12}$   | 92,107, $\infty_{13}$  | 107                                   | 67,82, $\infty_{13}$   |  |
| 100,103, $\infty_{14}$ | 31    | 131,2, $\infty_{14}$   | 101,119, $\infty_{15}$ | 103                                   | 72,90, $\infty_{15}$   |  |
| 76,118, $\infty_{16}$  | 38    | 114,24, $\infty_{16}$  | 75,125, $\infty_{17}$  | 21                                    | 96,14, $\infty_{17}$   |  |
| 72,112, $\infty_{18}$  | 23    | 95,3, $\infty_{18}$    | 68,131, $\infty_{19}$  | 92                                    | 28,91, $\infty_{19}$   |  |
| 60,109, $\infty_{20}$  | 10    | 70,119, $\infty_{20}$  | 57,104, $\infty_{21}$  | 29                                    | 86,1, $\infty_{21}$    |  |
| C                      |       | R                      |                        | A (1,2;3)-frame of type $12^{12}15^1$ |                        |  |
| 7,14,27                |       | 35,67,102              |                        |                                       |                        |  |
| 17,31,45               |       | 49,92,138              |                        |                                       |                        |  |
| 52,99,143              |       | 18,34,50               |                        |                                       |                        |  |
| 43,83,126              |       | 44,85,129              |                        |                                       |                        |  |
| 28,53,78               |       | 10,20,30               |                        |                                       |                        |  |
| Starter                | Adder | Starter+ Adder         | Starter                | Adder                                 | Starter + Adder        |  |
| 3,8,69                 | 140   | 143,4,65               | 18,49,122              | 19                                    | 37,68,141              |  |
| 5,55,131               | 114   | 119,25,101             | 64,82,117              | 23                                    | 87,105,140             |  |
| 29,32,62               | 104   | 133,136,22             | 19,34,40               | 81                                    | 100,115,121            |  |
| 51,73,115              | 44    | 95,117,15              | 42,47,94               | 116                                   | 14,19,66               |  |
| 26,67,141              | 83    | 109,6,80               | 16,79,102              | 88                                    | 104,23,46              |  |
| 1,2,112                | 89    | 90,91,57               | 50,63,101              | 26                                    | 76,89,127              |  |
| 37,41,119              | 33    | 70,74,8                | 58,61,92               | 55                                    | 113,116,3              |  |
| 9,15,114               | 46    | 55,61,16               | 35,89,106              | 102                                   | 137,47,64              |  |
| 11,74,104              | 115   | 126,45,75              | 21,44,109              | 42                                    | 63,86,7                |  |
| 38,46,57               | 65    | 103,111,122            | 10,90,139              | 63                                    | 73,9,58                |  |
| 39,65,66               | 58    | 97,123,124             | 30,56,105              | 13                                    | 43,69,118              |  |
| 23,25,110              | 87    | 110,112,53             | 33,100,121             | 137                                   | 26,93,114              |  |
| 20,75,137              | 8     | 28,83,1                | 4,6,111                | 50                                    | 54,56,17               |  |
| 13,22,138              | 85    | 98,107,79              | 54,124,133             | 52                                    | 106,32,41              |  |
| 71,129,140             | 17    | 88,2,13                | 80,88, $\infty_1$      | 95                                    | 31,39, $\infty_1$      |  |
| 81,118, $\infty_2$     | 47    | 128,21, $\infty_2$     | 91,95, $\infty_3$      | 91                                    | 38,42, $\infty_3$      |  |
| 93,135, $\infty_4$     | 38    | 131,29, $\infty_4$     | 97,142, $\infty_5$     | 141                                   | 94,139, $\infty_5$     |  |
| 98,127, $\infty_6$     | 57    | 11,40, $\infty_6$      | 123,130, $\infty_7$    | 73                                    | 52,59, $\infty_7$      |  |
| 86,103, $\infty_8$     | 39    | 125,142, $\infty_8$    | 87,125, $\infty_9$     | 90                                    | 33,71, $\infty_9$      |  |
| 85,107, $\infty_{10}$  | 136   | 77,99, $\infty_{10}$   | 77,134, $\infty_{11}$  | 1                                     | 78,135, $\infty_{11}$  |  |
| 76,128, $\infty_{12}$  | 6     | 82,134, $\infty_{12}$  | 70,116, $\infty_{13}$  | 79                                    | 5,51, $\infty_{13}$    |  |
| 68,136, $\infty_{14}$  | 138   | 62,130, $\infty_{14}$  | 59,113, $\infty_{15}$  | 112                                   | 27,81, $\infty_{15}$   |  |
| C                      |       | R                      |                        | A (1,2;3)-frame of type $12^{12}18^1$ |                        |  |
| 7,14,27                |       | 49,92,138              |                        |                                       |                        |  |
| 17,31,45               |       | 18,34,50               |                        |                                       |                        |  |
| 52,99,143              |       | 44,85,129              |                        |                                       |                        |  |
| 43,83,126              |       | 10,20,30               |                        |                                       |                        |  |
| 28,53,78               |       | 41,76,114              |                        |                                       |                        |  |
| 35,67,102              |       | 51,98,139              |                        |                                       |                        |  |
| Starter                | Adder | Starter+ Adder         | Starter                | Adder                                 | Starter + Adder        |  |
| 1,2,3                  | 30    | 31,32,33               | 58,92,129              | 32                                    | 90,124,17              |  |
| 62,93,124              | 9     | 71,102,133             | 63,97,142              | 16                                    | 79,113,14              |  |
| 64,94,133              | 13    | 77,107,2               | 21,30,39               | 79                                    | 100,109,118            |  |
| 20,73,115              | 117   | 137,46,88              | 19,81,89               | 38                                    | 57,119,127             |  |
| 18,33,37               | 50    | 68,83,87               | 11,15,26               | 41                                    | 52,56,67               |  |
| 25,42,65               | 1     | 26,43,66               | 22,90,139              | 3                                     | 25,93,142              |  |
| 38,71,121              | 2     | 40,73,123              | 34,55,100              | 4                                     | 38,59,104              |  |
| 57,112,135             | 5     | 62,117,140             | 54,82,141              | 7                                     | 61,89,4                |  |
| 56,95,114              | 8     | 64,103,122             | 44,111,137             | 10                                    | 54,121,3               |  |
| 47,80,117              | 11    | 58,91,128              | 46,109,138             | 17                                    | 63,126,11              |  |
| 50,79,130              | 15    | 65,94,1                | 49,75,105              | 20                                    | 69,95,125              |  |
| 4,6,9                  | 33    | 37,39,42               | 5,8,13                 | 73                                    | 78,81,86               |  |
| 10,16,23               | 143   | 9,15,22                | 29,40,98               | 101                                   | 130,141,55             |  |
| 32,74, $\infty_1$      | 78    | 110,8, $\infty_1$      | 41,122, $\infty_2$     | 138                                   | 35,116, $\infty_2$     |  |
| 51,131, $\infty_3$     | 19    | 70,6, $\infty_3$       | 61,140, $\infty_4$     | 51                                    | 112,47, $\infty_4$     |  |
| 66,88, $\infty_5$      | 69    | 135,13, $\infty_5$     | 69,123, $\infty_6$     | 37                                    | 106,16, $\infty_6$     |  |
| 91,118, $\infty_7$     | 45    | 136,19, $\infty_7$     | 101,119, $\infty_8$    | 140                                   | 97,115, $\infty_8$     |  |
| 104,110, $\infty_9$    | 63    | 23,29, $\infty_9$      | 106,127, $\infty_{10}$ | 118                                   | 80,101, $\infty_{10}$  |  |
| 86,103, $\infty_{11}$  | 86    | 28,45, $\infty_{11}$   | 87,125, $\infty_{12}$  | 18                                    | 105,143, $\infty_{12}$ |  |
| 85,107, $\infty_{13}$  | 64    | 5,27, $\infty_{13}$    | 77,134, $\infty_{14}$  | 141                                   | 74,131, $\infty_{14}$  |  |
| 76,128, $\infty_{15}$  | 6     | 82,134, $\infty_{15}$  | 70,116, $\infty_{16}$  | 127                                   | 53,99, $\infty_{16}$   |  |
| 68,136, $\infty_{17}$  | 83    | 7,75, $\infty_{17}$    | 59,113, $\infty_{18}$  | 52                                    | 111,21, $\infty_{18}$  |  |

Table 10 (Cont.)

| C                      |       | R                       |                         | A (1,2;3)-frame of type $12^{13}15^1$ |                        |  |
|------------------------|-------|-------------------------|-------------------------|---------------------------------------|------------------------|--|
| 7, 12, 23              |       | 29, 60, 97              |                         |                                       |                        |  |
| 14, 28, 36             |       | 17, 25, 45              |                         |                                       |                        |  |
| 21, 41, 58             |       | 44, 93, 139             |                         |                                       |                        |  |
| 48, 95, 142            |       | 40, 81, 125             |                         |                                       |                        |  |
| 34, 69, 107            |       | 49, 99, 149             |                         |                                       |                        |  |
| Starter                | Adder | Starter+ Adder          | Starter                 | Adder                                 | Starter + Adder        |  |
| 8, 119, 149            | 151   | 3, 114, 144             | 1, 67, 126              | 109                                   | 110, 20, 79            |  |
| 60, 92, 146            | 150   | 54, 86, 140             | 72, 97, 101             | 153                                   | 69, 94, 98             |  |
| 20, 73, 147            | 82    | 102, 155, 73            | 40, 44, 113             | 24                                    | 64, 68, 137            |  |
| 16, 33, 105            | 147   | 7, 24, 96               | 50, 61, 103             | 57                                    | 107, 118, 4            |  |
| 4, 109, 153            | 18    | 22, 127, 15             | 24, 81, 152             | 60                                    | 84, 141, 56            |  |
| 2, 83, 155             | 75    | 77, 2, 74               | 53, 98, 99              | 146                                   | 43, 88, 89             |  |
| 22, 31, 55             | 54    | 76, 85, 109             | 18, 76, 82              | 37                                    | 55, 113, 119           |  |
| 38, 45, 47             | 45    | 83, 90, 92              | 37, 64, 118             | 138                                   | 19, 46, 100            |  |
| 6, 96, 139             | 74    | 80, 14, 57              | 30, 49, 125             | 73                                    | 103, 122, 42           |  |
| 19, 51, 127            | 87    | 106, 138, 58            | 68, 70, 86              | 97                                    | 9, 11, 27              |  |
| 3, 43, 136             | 121   | 124, 8, 101             | 42, 93, 135             | 69                                    | 111, 6, 48             |  |
| 9, 15, 122             | 139   | 148, 154, 105           | 29, 63, 137             | 155                                   | 28, 62, 136            |  |
| 62, 74, 131            | 72    | 134, 146, 47            | 11, 32, 66              | 1                                     | 12, 33, 67             |  |
| 46, 116, 134           | 17    | 63, 133, 151            | 79, 114, 115            | 112                                   | 35, 70, 71             |  |
| 5, 128, 140            | 103   | 108, 75, 87             | 10, 25, 141             | 11                                    | 21, 36, 152            |  |
| 35, 54, 59             | 107   | 142, 5, 10              | 17, 27, 106             | 14                                    | 31, 41, 120            |  |
| 57, 151, 154           | 137   | 38, 132, 135            | 87, 123, $\infty_1$     | 128                                   | 59, 95, $\infty_1$     |  |
| 88, 129, $\infty_2$    | 59    | 147, 32, $\infty_2$     | 90, 150, $\infty_3$     | 132                                   | 66, 126, $\infty_3$    |  |
| 94, 108, $\infty_4$    | 99    | 37, 51, $\infty_4$      | 100, 138, $\infty_5$    | 90                                    | 34, 72, $\infty_5$     |  |
| 102, 124, $\infty_6$   | 55    | 1, 23, $\infty_6$       | 111, 121, $\infty_7$    | 10                                    | 121, 131, $\infty_7$   |  |
| 75, 133, $\infty_8$    | 53    | 128, 30, $\infty_8$     | 89, 145, $\infty_9$     | 64                                    | 153, 53, $\infty_9$    |  |
| 85, 112, $\infty_{10}$ | 38    | 123, 150, $\infty_{10}$ | 84, 144, $\infty_{11}$  | 28                                    | 112, 16, $\infty_{11}$ |  |
| 80, 110, $\infty_{12}$ | 35    | 115, 145, $\infty_{12}$ | 77, 132, $\infty_{13}$  | 140                                   | 61, 116, $\infty_{13}$ |  |
| 71, 148, $\infty_{14}$ | 58    | 129, 50, $\infty_{14}$  | 56, 120, $\infty_{15}$  | 118                                   | 18, 82, $\infty_{15}$  |  |
| C                      |       | R                       |                         | A (1,2;3)-frame of type $12^{13}18^1$ |                        |  |
| 7, 12, 23              |       | 17, 25, 45              |                         |                                       |                        |  |
| 14, 28, 36             |       | 44, 93, 139             |                         |                                       |                        |  |
| 21, 41, 58             |       | 40, 81, 125             |                         |                                       |                        |  |
| 48, 95, 142            |       | 49, 99, 149             |                         |                                       |                        |  |
| 34, 69, 107            |       | 46, 92, 141             |                         |                                       |                        |  |
| 29, 60, 97             |       | 19, 38, 63              |                         |                                       |                        |  |
| Starter                | Adder | Starter+ Adder          | Starter                 | Adder                                 | Starter + Adder        |  |
| 43, 151, 154           | 129   | 16, 124, 127            | 1, 125, 134             | 120                                   | 121, 89, 98            |  |
| 35, 106, 116           | 55    | 90, 5, 15               | 42, 66, 90              | 94                                    | 136, 4, 28             |  |
| 44, 124, 141           | 23    | 67, 147, 8              | 59, 86, 149             | 1                                     | 60, 87, 150            |  |
| 50, 93, 122            | 4     | 54, 97, 126             | 68, 102, 108            | 3                                     | 71, 105, 111           |  |
| 51, 54, 140            | 2     | 53, 56, 142             | 33, 88, 121             | 8                                     | 41, 96, 129            |  |
| 2, 115, 126            | 5     | 7, 120, 131             | 62, 64, 136             | 10                                    | 72, 74, 146            |  |
| 55, 96, 153            | 6     | 61, 102, 3              | 9, 123, 137             | 11                                    | 20, 134, 148           |  |
| 3, 92, 128             | 9     | 12, 101, 137            | 25, 63, 67              | 12                                    | 37, 75, 79             |  |
| 24, 105, 111           | 7     | 31, 112, 118            | 5, 6, 27                | 16                                    | 21, 22, 43             |  |
| 4, 135, 150            | 20    | 24, 155, 14             | 22, 38, 57              | 28                                    | 50, 66, 85             |  |
| 8, 10, 15              | 19    | 27, 29, 34              | 16, 20, 79              | 31                                    | 47, 51, 110            |  |
| 11, 18, 114            | 24    | 35, 42, 138             | 19, 31, 40              | 17                                    | 36, 48, 57             |  |
| 17, 32, 94             | 38    | 55, 70, 132             | 37, 49, 113             | 45                                    | 82, 94, 2              |  |
| 30, 53, 87             | 70    | 100, 123, 1             | 47, 98, 152             | 81                                    | 128, 23, 77            |  |
| 45, 46, 99             | 68    | 113, 114, 11            | 61, 101, 131            | 34                                    | 95, 135, 9             |  |
| 70, 139, $\infty_1$    | 14    | 84, 153, $\infty_1$     | 72, 138, $\infty_2$     | 36                                    | 108, 18, $\infty_2$    |  |
| 73, 146, $\infty_3$    | 93    | 10, 83, $\infty_3$      | 74, 103, $\infty_4$     | 41                                    | 115, 144, $\infty_4$   |  |
| 76, 109, $\infty_5$    | 43    | 119, 152, $\infty_5$    | 81, 155, $\infty_6$     | 155                                   | 80, 154, $\infty_6$    |  |
| 82, 127, $\infty_7$    | 138   | 64, 109, $\infty_7$     | 83, 119, $\infty_8$     | 106                                   | 33, 69, $\infty_8$     |  |
| 100, 118, $\infty_9$   | 22    | 122, 140, $\infty_9$    | 129, 147, $\infty_{10}$ | 115                                   | 88, 106, $\infty_{10}$ |  |
| 75, 133, $\infty_{11}$ | 139   | 58, 116, $\infty_{11}$  | 89, 145, $\infty_{12}$  | 97                                    | 30, 86, $\infty_{12}$  |  |
| 85, 112, $\infty_{13}$ | 147   | 76, 103, $\infty_{13}$  | 84, 144, $\infty_{14}$  | 145                                   | 73, 133, $\infty_{14}$ |  |
| 80, 110, $\infty_{15}$ | 108   | 32, 62, $\infty_{15}$   | 77, 132, $\infty_{16}$  | 30                                    | 107, 6, $\infty_{16}$  |  |
| 71, 148, $\infty_{17}$ | 153   | 68, 145, $\infty_{17}$  | 56, 120, $\infty_{18}$  | 95                                    | 151, 59, $\infty_{18}$ |  |



Table 10 (Cont.)

| C                       |       | R                       |                         | A (1,2;3)-frame of type $12^{13}21^1$ |                         |  |
|-------------------------|-------|-------------------------|-------------------------|---------------------------------------|-------------------------|--|
| Starter                 | Adder | Starter+ Adder          | Starter                 |                                       |                         |  |
| 7, 12, 23               |       | 44, 93, 139             |                         |                                       |                         |  |
| 14, 28, 36              |       | 40, 81, 125             |                         |                                       |                         |  |
| 21, 41, 58              |       | 49, 99, 149             |                         |                                       |                         |  |
| 48, 95, 142             |       | 46, 92, 141             |                         |                                       |                         |  |
| 34, 69, 107             |       | 19, 38, 63              |                         |                                       |                         |  |
| 29, 60, 97              |       | 43, 86, 129             |                         |                                       |                         |  |
| 17, 25, 45              |       | 10, 20, 42              |                         |                                       |                         |  |
| Starter                 | Adder | Starter+ Adder          | Starter                 | Adder                                 | Starter + Adder         |  |
| 46, 67, 138             | 2     | 48, 69, 140             | 40, 106, 129            | 5                                     | 45, 111, 134            |  |
| 37, 96, 121             | 10    | 47, 106, 131            | 33, 51, 131             | 4                                     | 37, 55, 135             |  |
| 32, 47, 64              | 3     | 35, 50, 67              | 44, 92, 147             | 15                                    | 59, 107, 6              |  |
| 43, 115, 136            | 8     | 51, 123, 144            | 68, 125, 154            | 7                                     | 75, 132, 5              |  |
| 49, 87, 123             | 22    | 71, 109, 145            | 72, 105, 134            | 16                                    | 88, 121, 150            |  |
| 53, 93, 126             | 1     | 54, 94, 127             | 55, 90, 124             | 18                                    | 73, 108, 142            |  |
| 54, 111, 135            | 25    | 79, 136, 4              | 59, 83, 128             | 30                                    | 89, 113, 2              |  |
| 57, 99, 153             | 11    | 68, 110, 8              | 70, 101, 146            | 17                                    | 87, 118, 7              |  |
| 62, 113, 155            | 33    | 95, 146, 32             | 66, 100, 140            | 14                                    | 80, 114, 154            |  |
| 63, 116, 152            | 21    | 84, 137, 17             | 1, 2, 3                 | 20                                    | 21, 22, 23              |  |
| 4, 6, 9                 | 24    | 28, 30, 33              | 5, 8, 15                | 19                                    | 24, 27, 34              |  |
| 10, 16, 22              | 48    | 58, 64, 70              | 11, 18, 27              | 85                                    | 96, 103, 112            |  |
| 19, 30, 109             | 6     | 25, 36, 115             | 20, 74, 88              | 9                                     | 29, 83, 97              |  |
| 24, 42, 139             | 77    | 101, 119, 60            | 31, 50, $\infty_1$      | 121                                   | 152, 15, $\infty_1$     |  |
| 35, 86, $\infty_2$      | 42    | 77, 128, $\infty_2$     | 38, 61, $\infty_3$      | 44                                    | 82, 105, $\infty_3$     |  |
| 73, 82, $\infty_4$      | 51    | 124, 133, $\infty_4$    | 76, 151, $\infty_5$     | 81                                    | 1, 76, $\infty_5$       |  |
| 79, 127, $\infty_6$     | 86    | 9, 57, $\infty_6$       | 81, 108, $\infty_7$     | 89                                    | 14, 41, $\infty_7$      |  |
| 94, 98, $\infty_8$      | 61    | 155, 3, $\infty_8$      | 102, 114, $\infty_9$    | 144                                   | 90, 102, $\infty_9$     |  |
| 103, 118, $\infty_{10}$ | 138   | 85, 100, $\infty_{10}$  | 119, 149, $\infty_{11}$ | 68                                    | 31, 61, $\infty_{11}$   |  |
| 122, 150, $\infty_{12}$ | 132   | 98, 126, $\infty_{12}$  | 137, 141, $\infty_{13}$ | 135                                   | 116, 120, $\infty_{13}$ |  |
| 75, 133, $\infty_{14}$  | 76    | 151, 53, $\infty_{14}$  | 89, 145, $\infty_{15}$  | 83                                    | 16, 72, $\infty_{15}$   |  |
| 85, 112, $\infty_{16}$  | 62    | 147, 18, $\infty_{16}$  | 84, 144, $\infty_{17}$  | 134                                   | 62, 122, $\infty_{17}$  |  |
| 80, 110, $\infty_{18}$  | 58    | 138, 12, $\infty_{18}$  | 77, 132, $\infty_{19}$  | 90                                    | 11, 66, $\infty_{19}$   |  |
| 71, 148, $\infty_{20}$  | 82    | 153, 74, $\infty_{20}$  | 56, 120, $\infty_{21}$  | 92                                    | 148, 56, $\infty_{21}$  |  |
| C                       |       | R                       |                         | A (1,2;3)-frame of type $12^{14}15^1$ |                         |  |
| Starter                 | Adder | Starter+ Adder          | Starter                 |                                       |                         |  |
| 17, 33, 49              |       | 51, 100, 155            |                         |                                       |                         |  |
| 19, 38, 57              |       | 53, 103, 156            |                         |                                       |                         |  |
| 27, 52, 86              |       | 31, 63, 104             |                         |                                       |                         |  |
| 41, 85, 129             |       | 37, 72, 113             |                         |                                       |                         |  |
| 46, 93, 143             |       | 23, 43, 66              |                         |                                       |                         |  |
| Starter                 | Adder | Starter+ Adder          | Starter                 | Adder                                 | Starter + Adder         |  |
| 40, 88, 123             | 107   | 147, 27, 62             | 22, 145, 152            | 32                                    | 54, 9, 16               |  |
| 55, 72, 161             | 95    | 150, 167, 88            | 23, 69, 131             | 11                                    | 34, 80, 142             |  |
| 2, 4, 5                 | 53    | 55, 57, 58              | 3, 120, 146             | 7                                     | 10, 127, 153            |  |
| 53, 61, 73              | 155   | 40, 48, 60              | 18, 109, 117            | 133                                   | 151, 74, 82             |  |
| 12, 100, 113            | 81    | 93, 13, 26              | 43, 111, 138            | 26                                    | 69, 13, 164             |  |
| 30, 144, 167            | 103   | 133, 79, 102            | 47, 80, 162             | 30                                    | 77, 110, 24             |  |
| 54, 66, 133             | 146   | 32, 44, 111             | 20, 114, 166            | 87                                    | 107, 33, 85             |  |
| 10, 34, 44              | 163   | 5, 29, 39               | 15, 78, 118             | 151                                   | 166, 61, 101            |  |
| 13, 95, 104             | 65    | 78, 160, 1              | 24, 156, 163            | 148                                   | 4, 136, 143             |  |
| 39, 60, 164             | 120   | 159, 12, 116            | 25, 132, 136            | 25                                    | 50, 157, 161            |  |
| 48, 50, 74              | 167   | 47, 49, 73              | 31, 67, 116             | 63                                    | 94, 130, 11             |  |
| 45, 139, 150            | 138   | 15, 109, 120            | 35, 65, 110             | 123                                   | 158, 20, 65             |  |
| 11, 29, 68              | 141   | 152, 2, 41              | 7, 16, 124              | 125                                   | 132, 141, 81            |  |
| 75, 105, 151            | 152   | 59, 89, 135             | 1, 101, 159             | 105                                   | 106, 38, 96             |  |
| 9, 90, 130              | 153   | 162, 75, 115            | 32, 36, 37              | 85                                    | 117, 121, 122           |  |
| 8, 107, 155             | 137   | 145, 76, 124            | 21, 87, 158             | 78                                    | 99, 165, 68             |  |
| 62, 79, 134             | 124   | 18, 35, 90              | 51, 141, 147            | 57                                    | 108, 30, 36             |  |
| 6, 108, 137             | 77    | 83, 17, 46              | 58, 64, 91              | 129                                   | 19, 25, 52              |  |
| 63, 102, 115            | 23    | 86, 125, 138            | 76, 157, $\infty_1$     | 19                                    | 95, 8, $\infty_1$       |  |
| 82, 97, $\infty_2$      | 66    | 148, 163, $\infty_2$    | 96, 99, $\infty_3$      | 75                                    | 3, 6, $\infty_3$        |  |
| 106, 121, $\infty_4$    | 13    | 119, 134, $\infty_4$    | 122, 127, $\infty_5$    | 17                                    | 139, 144, $\infty_5$    |  |
| 128, 165, $\infty_6$    | 131   | 91, 128, $\infty_6$     | 142, 160, $\infty_7$    | 113                                   | 87, 105, $\infty_7$     |  |
| 92, 153, $\infty_8$     | 22    | 114, 7, $\infty_8$      | 89, 148, $\infty_9$     | 143                                   | 64, 123, $\infty_9$     |  |
| 83, 94, $\infty_{10}$   | 35    | 118, 129, $\infty_{10}$ | 81, 103, $\infty_{11}$  | 132                                   | 45, 67, $\infty_{11}$   |  |
| 77, 135, $\infty_{12}$  | 54    | 131, 21, $\infty_{12}$  | 71, 125, $\infty_{13}$  | 21                                    | 92, 146, $\infty_{13}$  |  |
| 59, 149, $\infty_{14}$  | 90    | 149, 71, $\infty_{14}$  | 26, 119, $\infty_{15}$  | 71                                    | 97, 22, $\infty_{15}$   |  |

Table 10 (Cont.)

| C                      |       | R                       |                         | A (1,2;3)-frame of type $12^{14}18^1$ |                         |  |
|------------------------|-------|-------------------------|-------------------------|---------------------------------------|-------------------------|--|
| Starter                | Adder | Starter+ Adder          | Starter                 |                                       |                         |  |
| 17,33,49               |       | 53,103,156              |                         |                                       |                         |  |
| 19,38,57               |       | 31,63,104               |                         |                                       |                         |  |
| 27,52,86               |       | 37,72,113               |                         |                                       |                         |  |
| 41,85,129              |       | 23,43,66                |                         |                                       |                         |  |
| 46,93,143              |       | 8,15,25                 |                         |                                       |                         |  |
| 51,100,155             |       | 48,94,149               |                         |                                       |                         |  |
| Starter                | Adder | Starter+ Adder          | Starter                 | Adder                                 | Starter + Adder         |  |
| 50, 111, 113           | 68    | 118, 11, 13             | 45, 53, 90              | 16                                    | 61, 69, 106             |  |
| 3, 75, 118             | 41    | 44, 116, 159            | 20, 78, 158             | 69                                    | 89, 147, 59             |  |
| 62, 68, 114            | 18    | 80, 86, 132             | 30, 109, 160            | 37                                    | 67, 146, 29             |  |
| 39, 65, 101            | 32    | 71, 97, 133             | 4, 124, 136             | 89                                    | 93, 45, 57              |  |
| 7, 47, 152             | 11    | 18, 58, 163             | 12, 120, 128            | 24                                    | 36, 144, 152            |  |
| 13, 34, 102            | 104   | 117, 138, 38            | 24, 48, 117             | 72                                    | 96, 120, 21             |  |
| 32, 37, 58             | 97    | 129, 134, 155           | 6, 91, 167              | 33                                    | 39, 124, 32             |  |
| 23, 36, 63             | 52    | 75, 88, 115             | 31, 116, 134            | 51                                    | 82, 167, 17             |  |
| 21, 22, 122            | 86    | 107, 108, 40            | 16, 29, 166             | 107                                   | 123, 136, 105           |  |
| 1, 87, 132             | 100   | 101, 19, 64             | 10, 121, 145            | 73                                    | 83, 26, 50              |  |
| 8, 9, 142              | 1     | 9, 10, 143              | 2, 5, 76                | 2                                     | 4, 7, 78                |  |
| 18, 95, 161            | 4     | 22, 99, 165             | 11, 106, 157            | 5                                     | 16, 111, 162            |  |
| 43, 73, 147            | 3     | 46, 76, 150             | 15, 25, 144             | 9                                     | 24, 34, 153             |  |
| 54, 69, 150            | 8     | 62, 77, 158             | 40, 88, 97              | 12                                    | 52, 100, 109            |  |
| 67, 79, 96             | 6     | 73, 85, 102             | 61, 115, 130            | 7                                     | 68, 122, 137            |  |
| 44, 55, 64             | 66    | 110, 121, 130           | 35, 137, 141            | 20                                    | 55, 157, 161            |  |
| 66, 72, 99             | 143   | 41, 47, 74              | 60, 146, 151            | 82                                    | 142, 60, 65             |  |
| 74, 164, $\infty_1$    | 53    | 127, 49, $\infty_1$     | 80, 127, $\infty_2$     | 39                                    | 119, 166, $\infty_2$    |  |
| 82, 163, $\infty_3$    | 165   | 79, 160, $\infty_3$     | 104, 108, $\infty_4$    | 155                                   | 91, 95, $\infty_4$      |  |
| 105, 165, $\infty_5$   | 23    | 128, 20, $\infty_5$     | 107, 138, $\infty_6$    | 63                                    | 2, 33, $\infty_6$       |  |
| 110, 139, $\infty_7$   | 64    | 6, 35, $\infty_7$       | 123, 162, $\infty_8$    | 137                                   | 92, 131, $\infty_8$     |  |
| 131, 133, $\infty_9$   | 38    | 1, 3, $\infty_9$        | 156, 159, $\infty_{10}$ | 157                                   | 145, 148, $\infty_{10}$ |  |
| 92, 153, $\infty_{11}$ | 166   | 90, 151, $\infty_{11}$  | 89, 148, $\infty_{12}$  | 50                                    | 139, 30, $\infty_{12}$  |  |
| 83, 94, $\infty_{13}$  | 31    | 114, 125, $\infty_{13}$ | 81, 103, $\infty_{14}$  | 92                                    | 5, 27, $\infty_{14}$    |  |
| 77, 135, $\infty_{15}$ | 87    | 164, 54, $\infty_{15}$  | 71, 125, $\infty_{16}$  | 10                                    | 81, 135, $\infty_{16}$  |  |
| 59, 149, $\infty_{17}$ | 160   | 51, 141, $\infty_{17}$  | 26, 119, $\infty_{18}$  | 61                                    | 87, 12, $\infty_{18}$   |  |
| Starter                | Adder | Starter+ Adder          | Starter                 | Adder                                 | Starter + Adder         |  |
| 53, 115, 125           | 46    | 99, 161, 171            | 61, 87, 171             | 125                                   | 6, 32, 116              |  |
| 27, 65, 129            | 14    | 41, 79, 143             | 31, 42, 133             | 154                                   | 5, 16, 107              |  |
| 63, 89, 151            | 93    | 156, 2, 64              | 62, 108, 118            | 153                                   | 35, 81, 91              |  |
| 41, 74, 158            | 164   | 25, 58, 142             | 4, 23, 43               | 78                                    | 82, 101, 121            |  |
| 49, 110, 178           | 22    | 71, 132, 20             | 50, 85, 92              | 87                                    | 137, 172, 179           |  |
| 25, 29, 36             | 86    | 111, 115, 122           | 5, 70, 104              | 103                                   | 108, 173, 27            |  |
| 2, 67, 96              | 123   | 125, 10, 39             | 56, 138, 147            | 37                                    | 93, 175, 4              |  |
| 3, 128, 130            | 18    | 21, 146, 148            | 1, 148, 175             | 173                                   | 174, 141, 168           |  |
| 28, 80, 126            | 38    | 66, 118, 164            | 19, 112, 170            | 79                                    | 98, 11, 69              |  |
| 21, 39, 176            | 108   | 129, 147, 104           | 51, 69, 143             | 27                                    | 78, 96, 170             |  |
| 54, 66, 71             | 1     | 55, 67, 72              | 6, 10, 149              | 2                                     | 8, 12, 151              |  |
| 48, 102, 124           | 4     | 52, 106, 128            | 14, 153, 154            | 5                                     | 19, 158, 159            |  |
| 44, 111, 123           | 3     | 47, 114, 126            | 32, 34, 55              | 6                                     | 38, 40, 61              |  |
| 26, 35, 162            | 7     | 33, 42, 169             | 13, 52, 113             | 10                                    | 23, 62, 123             |  |
| 68, 84, 179            | 8     | 76, 92, 7               | 46, 139, 163            | 13                                    | 59, 152, 176            |  |
| 58, 101, 169           | 12    | 70, 113, 1              | 37, 93, 141             | 26                                    | 63, 119, 167            |  |
| 11, 134, 142           | 11    | 22, 145, 153            | 8, 78, 122              | 16                                    | 24, 94, 138             |  |
| 18, 24, 121            | 56    | 74, 80, 177             | 17, 140, 161            | 17                                    | 34, 157, 178            |  |
| 76, 79, 127            | 33    | 109, 112, 160           | 73, 86, 167             | 63                                    | 136, 149, 50            |  |
| 88, 160, $\infty_1$    | 175   | 83, 155, $\infty_1$     | 91, 174, $\infty_2$     | 146                                   | 57, 140, $\infty_2$     |  |
| 100, 136, $\infty_3$   | 98    | 18, 54, $\infty_3$      | 103, 157, $\infty_4$    | 126                                   | 49, 103, $\infty_4$     |  |
| 116, 144, $\infty_5$   | 73    | 9, 37, $\infty_5$       | 131, 173, $\infty_6$    | 137                                   | 88, 130, $\infty_6$     |  |
| 132, 159, $\infty_7$   | 145   | 97, 124, $\infty_7$     | 145, 146, $\infty_8$    | 168                                   | 133, 134, $\infty_8$    |  |
| 106, 156, $\infty_9$   | 151   | 77, 127, $\infty_9$     | 114, 137, $\infty_{10}$ | 25                                    | 139, 162, $\infty_{10}$ |  |
| 83, 107, $\infty_{11}$ | 162   | 65, 89, $\infty_{11}$   | 95, 166, $\infty_{12}$  | 99                                    | 14, 85, $\infty_{12}$   |  |
| 98, 164, $\infty_{13}$ | 111   | 29, 95, $\infty_{13}$   | 99, 172, $\infty_{14}$  | 94                                    | 13, 86, $\infty_{14}$   |  |
| 94, 97, $\infty_{15}$  | 69    | 163, 166, $\infty_{15}$ | 72, 152, $\infty_{16}$  | 72                                    | 144, 44, $\infty_{16}$  |  |
| 81, 155, $\infty_{17}$ | 142   | 43, 117, $\infty_{17}$  | 9, 82, $\infty_{18}$    | 101                                   | 110, 3, $\infty_{18}$   |  |
| Starter                | Adder | Starter+ Adder          | Starter                 | Adder                                 | Starter + Adder         |  |
| 7, 12, 20              |       | 46, 84, 131             |                         |                                       |                         |  |
| 16, 33, 47             |       | 53, 102, 154            |                         |                                       |                         |  |
| 22, 38, 57             |       | 28, 56, 87              |                         |                                       |                         |  |
| 59, 109, 168           |       | 17, 31, 51              |                         |                                       |                         |  |
| 64, 119, 177           |       | 36, 68, 100             |                         |                                       |                         |  |
| 40, 77, 117            |       | 26, 48, 73              |                         |                                       |                         |  |
| Starter                | Adder | Starter+ Adder          | Starter                 | Adder                                 | Starter + Adder         |  |
| 7, 12, 20              |       | 46, 84, 131             |                         |                                       |                         |  |
| 16, 33, 47             |       | 53, 102, 154            |                         |                                       |                         |  |
| 22, 38, 57             |       | 28, 56, 87              |                         |                                       |                         |  |
| 59, 109, 168           |       | 17, 31, 51              |                         |                                       |                         |  |
| 64, 119, 177           |       | 36, 68, 100             |                         |                                       |                         |  |
| 40, 77, 117            |       | 26, 48, 73              |                         |                                       |                         |  |

Table 10 (Cont.)

| C                         |       | R                         |                           | A (1,2;3)-frame of type 12 <sup>15</sup> 21 <sup>1</sup> |                           |  |
|---------------------------|-------|---------------------------|---------------------------|----------------------------------------------------------|---------------------------|--|
| 7, 12, 20                 |       | 53, 102, 154              |                           |                                                          |                           |  |
| 16, 33, 47                |       | 28, 56, 87                |                           |                                                          |                           |  |
| 22, 38, 57                |       | 17, 31, 51                |                           |                                                          |                           |  |
| 59, 109, 168              |       | 36, 68, 100               |                           |                                                          |                           |  |
| 64, 119, 177              |       | 26, 48, 73                |                           |                                                          |                           |  |
| 40, 77, 117               |       | 19, 35, 54                |                           |                                                          |                           |  |
| 46, 84, 131               |       | 50, 96, 142               |                           |                                                          |                           |  |
| Starter                   | Adder | Starter+ Adder            | Starter                   | Adder                                                    | Starter + Adder           |  |
| 8, 14, 127                | 4     | 12, 18, 131               | 37, 65, 161               | 6                                                        | 43, 71, 167               |  |
| 56, 58, 67                | 48    | 104, 106, 115             | 36, 139, 159              | 1                                                        | 37, 140, 160              |  |
| 55, 123, 136              | 2     | 57, 125, 138              | 10, 148, 173              | 143                                                      | 153, 111, 136             |  |
| 11, 19, 29                | 5     | 16, 24, 34                | 21, 158, 162              | 8                                                        | 29, 166, 170              |  |
| 34, 35, 87                | 12    | 46, 47, 99                | 6, 32, 149                | 7                                                        | 13, 39, 156               |  |
| 24, 31, 141               | 148   | 172, 179, 109             | 25, 27, 48                | 17                                                       | 42, 44, 65                |  |
| 28, 39, 61                | 13    | 41, 52, 74                | 17, 129, 132              | 16                                                       | 33, 145, 148              |  |
| 18, 23, 116               | 46    | 64, 69, 162               | 44, 86, 140               | 42                                                       | 86, 128, 2                |  |
| 49, 85, 146               | 106   | 155, 11, 72               | 42, 68, 134               | 39                                                       | 81, 107, 173              |  |
| 52, 122, 163              | 11    | 63, 133, 174              | 1, 142, 171               | 76                                                       | 77, 38, 67                |  |
| 2, 74, 118                | 87    | 89, 161, 25               | 13, 113, 169              | 99                                                       | 112, 32, 88               |  |
| 53, 71, 157               | 116   | 169, 7, 93                | 3, 92, 154                | 24                                                       | 27, 116, 178              |  |
| 41, 110, 143              | 41    | 82, 151, 4                | 80, 89, 175               | 54                                                       | 134, 143, 49              |  |
| 50, 93, 147               | 29    | 79, 122, 176              | 51, 91, 178               | 68                                                       | 119, 159, 66              |  |
| 70, 125, 176              | 14    | 84, 139, 10               | 73, 79, 100               | 18                                                       | 91, 97, 118               |  |
| 43, 101, 145              | 40    | 83, 141, 5                | 26, 130, 179              | 145                                                      | 171, 95, 144              |  |
| 5, 62, 151                | 158   | 163, 40, 129              | 4, 69, 76                 | 88                                                       | 92, 157, 164              |  |
| 54, 102, 153              | 22    | 76, 124, 175              | 63, 104, ∞ <sub>1</sub>   | 138                                                      | 21, 62, ∞ <sub>1</sub>    |  |
| 66, 167, ∞ <sub>2</sub>   | 111   | 177, 98, ∞ <sub>2</sub>   | 78, 160, ∞ <sub>3</sub>   | 23                                                       | 101, 3, ∞ <sub>3</sub>    |  |
| 88, 126, ∞ <sub>4</sub>   | 26    | 114, 152, ∞ <sub>4</sub>  | 96, 144, ∞ <sub>5</sub>   | 162                                                      | 78, 126, ∞ <sub>5</sub>   |  |
| 103, 115, ∞ <sub>6</sub>  | 34    | 137, 149, ∞ <sub>6</sub>  | 108, 170, ∞ <sub>7</sub>  | 157                                                      | 85, 147, ∞ <sub>7</sub>   |  |
| 111, 112, ∞ <sub>8</sub>  | 91    | 22, 23, ∞ <sub>8</sub>    | 121, 133, ∞ <sub>9</sub>  | 117                                                      | 58, 70, ∞ <sub>9</sub>    |  |
| 124, 128, ∞ <sub>10</sub> | 169   | 113, 117, ∞ <sub>10</sub> | 138, 174, ∞ <sub>11</sub> | 152                                                      | 110, 146, ∞ <sub>11</sub> |  |
| 106, 156, ∞ <sub>12</sub> | 154   | 80, 130, ∞ <sub>12</sub>  | 114, 137, ∞ <sub>13</sub> | 44                                                       | 158, 1, ∞ <sub>13</sub>   |  |
| 83, 107, ∞ <sub>14</sub>  | 20    | 103, 127, ∞ <sub>14</sub> | 95, 166, ∞ <sub>15</sub>  | 28                                                       | 123, 14, ∞ <sub>15</sub>  |  |
| 98, 164, ∞ <sub>16</sub>  | 137   | 55, 121, ∞ <sub>16</sub>  | 99, 172, ∞ <sub>17</sub>  | 69                                                       | 168, 61, ∞ <sub>17</sub>  |  |
| 94, 97, ∞ <sub>18</sub>   | 92    | 6, 9, ∞ <sub>18</sub>     | 72, 152, ∞ <sub>19</sub>  | 36                                                       | 108, 8, ∞ <sub>19</sub>   |  |
| 81, 155, ∞ <sub>20</sub>  | 119   | 20, 94, ∞ <sub>20</sub>   | 9, 82, ∞ <sub>21</sub>    | 50                                                       | 59, 132, ∞ <sub>21</sub>  |  |
| C                         |       | R                         |                           | A (1,2;3)-frame of type 12 <sup>17</sup> 18 <sup>1</sup> |                           |  |
| 18, 37, 56                |       | 64, 131, 195              |                           |                                                          |                           |  |
| 27, 52, 80                |       | 55, 104, 159              |                           |                                                          |                           |  |
| 35, 70, 108               |       | 38, 78, 118               |                           |                                                          |                           |  |
| 45, 86, 127               |       | 23, 43, 66                |                           |                                                          |                           |  |
| 53, 106, 162              |       | 10, 21, 32                |                           |                                                          |                           |  |
| 59, 120, 184              |       | 49, 99, 143               |                           |                                                          |                           |  |
| Starter                   | Adder | Starter+ Adder            | Starter                   | Adder                                                    | Starter + Adder           |  |
| 78, 111, 177              | 174   | 48, 81, 147               | 42, 129, 158              | 52                                                       | 94, 181, 6                |  |
| 41, 62, 88                | 109   | 150, 171, 197             | 71, 100, 130              | 149                                                      | 16, 45, 75                |  |
| 13, 20, 26                | 37    | 50, 57, 63                | 44, 125, 152              | 67                                                       | 111, 192, 15              |  |
| 55, 116, 147              | 144   | 199, 56, 87               | 49, 112, 178              | 184                                                      | 29, 92, 158               |  |
| 93, 151, 199              | 89    | 182, 36, 84               | 46, 115, 167              | 76                                                       | 122, 191, 39              |  |
| 69, 140, 185              | 181   | 46, 117, 162              | 95, 155, 201              | 131                                                      | 22, 82, 128               |  |
| 73, 118, 193              | 42    | 115, 160, 31              | 48, 104, 174              | 126                                                      | 174, 26, 96               |  |
| 76, 150, 180              | 33    | 109, 183, 9               | 77, 124, 191              | 121                                                      | 198, 41, 108              |  |
| 92, 146, 203              | 179   | 67, 121, 178              | 83, 135, 197              | 145                                                      | 24, 76, 138               |  |
| 89, 166, 182              | 195   | 80, 157, 173              | 90, 122, 164              | 47                                                       | 137, 169, 7               |  |
| 66, 145, 169              | 79    | 145, 20, 44               | 7, 11, 16                 | 196                                                      | 203, 3, 8                 |  |
| 33, 110, 138              | 108   | 141, 14, 42               | 1, 2, 3                   | 162                                                      | 163, 164, 165             |  |
| 74, 139, 198              | 190   | 60, 125, 184              | 19, 25, 175               | 169                                                      | 188, 194, 140             |  |
| 72, 144, 190              | 186   | 54, 126, 172              | 67, 117, 179              | 38                                                       | 105, 155, 13              |  |
| 97, 134, 173              | 165   | 58, 95, 134               | 58, 91, 161               | 132                                                      | 190, 19, 89               |  |
| 65, 101, 188              | 28    | 93, 129, 12               | 82, 154, 189              | 183                                                      | 61, 133, 168              |  |
| 21, 31, 43                | 16    | 37, 47, 59                | 10, 128, 149              | 141                                                      | 151, 65, 86               |  |
| 23, 107, 196              | 60    | 83, 167, 52               | 14, 22, 30                | 163                                                      | 177, 185, 193             |  |
| 15, 28, 38                | 75    | 90, 103, 113              | 96, 133, 172              | 106                                                      | 202, 35, 74               |  |
| 4, 6, 9                   | 21    | 25, 27, 30                | 5, 8, 12                  | 134                                                      | 139, 142, 146             |  |
| 24, 36, 50                | 172   | 196, 4, 18                | 29, 47, 61                | 69                                                       | 98, 116, 130              |  |
| 32, 57, 75                | 91    | 123, 148, 166             | 40, 60, 131               | 146                                                      | 186, 2, 73                |  |
| 63, 99, 141               | 8     | 71, 107, 149              | 79, 137, 186              | 194                                                      | 69, 127, 176              |  |
| 39, 121, ∞ <sub>1</sub>   | 14    | 53, 135, ∞ <sub>1</sub>   | 54, 143, ∞ <sub>2</sub>   | 161                                                      | 11, 100, ∞ <sub>2</sub>   |  |
| 64, 159, ∞ <sub>3</sub>   | 46    | 110, 1, ∞ <sub>3</sub>    | 81, 105, ∞ <sub>4</sub>   | 39                                                       | 120, 144, ∞ <sub>4</sub>  |  |
| 84, 194, ∞ <sub>5</sub>   | 199   | 79, 189, ∞ <sub>5</sub>   | 87, 183, ∞ <sub>6</sub>   | 93                                                       | 180, 72, ∞ <sub>6</sub>   |  |
| 94, 157, ∞ <sub>7</sub>   | 18    | 112, 175, ∞ <sub>7</sub>  | 98, 181, ∞ <sub>8</sub>   | 63                                                       | 161, 40, ∞ <sub>8</sub>   |  |
| 103, 160, ∞ <sub>9</sub>  | 198   | 97, 154, ∞ <sub>9</sub>   | 109, 200, ∞ <sub>10</sub> | 128                                                      | 33, 124, ∞ <sub>10</sub>  |  |
| 113, 168, ∞ <sub>11</sub> | 192   | 101, 156, ∞ <sub>11</sub> | 114, 123, ∞ <sub>12</sub> | 86                                                       | 200, 5, ∞ <sub>12</sub>   |  |
| 126, 195, ∞ <sub>13</sub> | 6     | 132, 201, ∞ <sub>13</sub> | 132, 176, ∞ <sub>14</sub> | 142                                                      | 70, 114, ∞ <sub>14</sub>  |  |
| 142, 202, ∞ <sub>15</sub> | 90    | 28, 88, ∞ <sub>15</sub>   | 148, 163, ∞ <sub>16</sub> | 118                                                      | 62, 77, ∞ <sub>16</sub>   |  |
| 156, 171, ∞ <sub>17</sub> | 139   | 91, 106, ∞ <sub>17</sub>  | 165, 192, ∞ <sub>18</sub> | 191                                                      | 152, 179, ∞ <sub>18</sub> |  |

Table 10 (Cont.)

| C                      |       | R                      |                        | A (1,2;3)-frame of type $12^{18}18^1$ |                        |
|------------------------|-------|------------------------|------------------------|---------------------------------------|------------------------|
| Starter                | Adder | Starter+ Adder         | Starter                |                                       |                        |
| 17,33,49               |       | 71,138,205             |                        |                                       |                        |
| 28,60,86               |       | 64,123,182             |                        |                                       |                        |
| 41,78,118              |       | 34,63,98               |                        |                                       |                        |
| 50,96,142              |       | 23,43,66               |                        |                                       |                        |
| 58,114,170             |       | 10,21,32               |                        |                                       |                        |
| 67,128,189             |       | 53,105,157             |                        |                                       |                        |
| Starter                | Adder | Starter+ Adder         | Starter                | Adder                                 | Starter + Adder        |
| 95,132,202             | 163   | 42,79,149              | 30,45,64               | 110                                   | 140,155,174            |
| 10,19,25               | 204   | 214,7,13               | 27,39,112              | 41                                    | 68,80,153              |
| 62,105,194             | 31    | 93,136,9               | 43,73,130              | 121                                   | 164,194,35             |
| 47,122,153             | 82    | 129,204,19             | 42,157,178             | 58                                    | 100,215,20             |
| 14,20,119              | 181   | 195,201,84             | 40,117,203             | 172                                   | 212,73,159             |
| 85,147,195             | 43    | 128,190,22             | 7,11,16                | 195                                   | 202,206,211            |
| 15,23,37               | 1     | 16,24,38               | 5,8,12                 | 112                                   | 117,120,124            |
| 79,129,211             | 139   | 2,52,134               | 55,136,174             | 210                                   | 49,130,168             |
| 29,167,196             | 155   | 184,106,135            | 2,4,124                | 143                                   | 145,147,51             |
| 32,51,76               | 9     | 41,60,85               | 88,121,191             | 22                                    | 110,143,213            |
| 74,165,192             | 38    | 112,203,14             | 87,140,206             | 207                                   | 78,131,197             |
| 21,31,44               | 212   | 17,27,40               | 97,148,199             | 73                                    | 170,5,56               |
| 66,141,175             | 17    | 83,158,192             | 103,166,208            | 183                                   | 70,133,175             |
| 99,146,201             | 62    | 161,208,47             | 101,143,182            | 84                                    | 185,11,50              |
| 68,163,204             | 98    | 166,45,86              | 92,155,215             | 170                                   | 46,109,169             |
| 104,134,207            | 186   | 74,104,177             | 35,61,82               | 81                                    | 116,142,163            |
| 84,115,200             | 176   | 44,75,160              | 102,152,197            | 151                                   | 37,87,132              |
| 77,145,193             | 119   | 196,48,96              | 81,150,210             | 128                                   | 209,62,122             |
| 52,109,185             | 6     | 58,115,191             | 75,120,164             | 153                                   | 12,57,101              |
| 71,139,188             | 214   | 69,137,186             | 98,137,177             | 146                                   | 28,67,107              |
| 94,159,214             | 152   | 30,95,150              | 80,151,213             | 142                                   | 6,77,139               |
| 53,131,205             | 114   | 167,29,103             | 24,38,48               | 193                                   | 1,15,25                |
| 59,125,160             | 23    | 82,148,183             | 1,3,6                  | 175                                   | 176,178,181            |
| 13,26,46               | 68    | 81,94,114              | 69,138,209             | 104                                   | 173,26,97              |
| 57,149,187             | 2     | 59,151,189             | 89,154,212             | 203                                   | 76,141,199             |
| 9,184, $\infty_1$      | 93    | 102,61, $\infty_1$     | 22,110, $\infty_2$     | 69                                    | 91,179, $\infty_2$     |
| 34,176, $\infty_3$     | 79    | 113,39, $\infty_3$     | 56,181, $\infty_4$     | 100                                   | 156,65, $\infty_4$     |
| 63,91, $\infty_5$      | 55    | 118,146, $\infty_5$    | 65,93, $\infty_6$      | 34                                    | 99,127, $\infty_6$     |
| 70,158, $\infty_7$     | 150   | 4,92, $\infty_7$       | 83,107, $\infty_8$     | 164                                   | 31,55, $\infty_8$      |
| 100,179, $\infty_9$    | 21    | 121,200, $\infty_9$    | 106,113, $\infty_{10}$ | 59                                    | 165,172, $\infty_{10}$ |
| 111,123, $\infty_{11}$ | 96    | 207,3, $\infty_{11}$   | 116,133, $\infty_{12}$ | 77                                    | 193,210, $\infty_{12}$ |
| 127,135, $\infty_{13}$ | 200   | 111,119, $\infty_{13}$ | 156,183, $\infty_{14}$ | 185                                   | 125,152, $\infty_{14}$ |
| 161,186, $\infty_{15}$ | 63    | 8,33, $\infty_{15}$    | 168,169, $\infty_{16}$ | 19                                    | 187,188, $\infty_{16}$ |
| 171,172, $\infty_{17}$ | 133   | 88,89, $\infty_{17}$   | 173,190, $\infty_{18}$ | 197                                   | 154,171, $\infty_{18}$ |
| C                      |       | R                      |                        | A (1,2;3)-frame of type $12^{19}18^1$ |                        |
| Starter                | Adder | Starter+ Adder         | Starter                |                                       |                        |
| 18,35,55               |       | 66,130,200             |                        |                                       |                        |
| 72,143,217             |       | 40,77,117              |                        |                                       |                        |
| 59,118,174             |       | 52,104,162             |                        |                                       |                        |
| 48,100,158             |       | 28,54,83               |                        |                                       |                        |
| 34,68,102              |       | 62,126,193             |                        |                                       |                        |
| 26,51,79               |       | 43,87,134              |                        |                                       |                        |
| Starter                | Adder | Starter+ Adder         | Starter                | Adder                                 | Starter + Adder        |
| 74,122,193             | 93    | 167,215,58             | 29,120,165             | 219                                   | 20,111,156             |
| 103,138,181            | 56    | 159,194,9              | 111,150,186            | 105                                   | 216,27,63              |
| 106,147,187            | 181   | 59,100,140             | 99,162,224             | 136                                   | 7,70,132               |
| 24,37,125              | 212   | 8,21,109               | 28,40,54               | 103                                   | 131,143,157            |
| 5,8,204                | 184   | 189,192,160            | 39,137,159             | 68                                    | 107,205,227            |
| 45,131,218             | 185   | 2,88,175               | 9,101,113              | 161                                   | 170,34,46              |
| 107,153,197            | 116   | 223,41,85              | 90,123,219             | 89                                    | 179,212,80             |
| 70,144,216             | 22    | 92,166,10              | 52,97,132              | 122                                   | 174,219,26             |
| 89,155,205             | 210   | 71,137,187             | 94,148,213             | 7                                     | 101,155,220            |
| 4,6,10                 | 197   | 201,203,207            | 32,47,63               | 58                                    | 90,105,121             |
| 81,142,220             | 102   | 183,16,94              | 43,61,84               | 41                                    | 84,102,125             |
| 86,134,183             | 173   | 31,79,128              | 69,96,192              | 81                                    | 150,177,45             |
| 33,53,75               | 11    | 44,64,86               | 110,146,189            | 135                                   | 17,53,96               |
| 15,25,36               | 129   | 144,154,165            | 98,160,226             | 26                                    | 124,186,24             |
| 82,112,175             | 131   | 213,15,78              | 66,173,212             | 115                                   | 181,60,99              |
| 78,129,206             | 104   | 182,5,82               | 104,157,225            | 6                                     | 110,163,3              |
| 56,140,167             | 86    | 142,226,25             | 50,130,195             | 179                                   | 1,81,146               |
| 87,172,222             | 112   | 199,56,106             | 108,177,223            | 40                                    | 148,217,35             |
| 92,161,221             | 158   | 22,91,151              | 20,30,41               | 78                                    | 98,108,119             |
| 11,17,215              | 25    | 36,42,12               | 88,178,210             | 153                                   | 13,103,135             |
| 58,117,184             | 166   | 224,55,122             | 91,151,207             | 170                                   | 33,93,149              |
| 93,166,227             | 30    | 123,196,29             | 42,65,169              | 96                                    | 138,161,37             |
| 62,149,182             | 85    | 147,6,39               | 71,141,214             | 44                                    | 115,185,30             |
| 13,21,119              | 132   | 145,153,23             | 105,154,208            | 192                                   | 69,118,172             |
| 67,85,109              | 113   | 180,198,222            | 1,2,3                  | 72                                    | 73,74,75               |
| 46,135,163             | 43    | 89,178,206             | 7,12,16                | 157                                   | 164,169,173            |
| 77,156,203             | 201   | 50,129,176             | 64,136,211             | 3                                     | 67,139,214             |
| 14,23, $\infty_1$      | 174   | 188,197, $\infty_1$    | 22,73, $\infty_2$      | 220                                   | 14,65, $\infty_2$      |
| 27,44, $\infty_3$      | 24    | 51,68, $\infty_3$      | 31,115, $\infty_4$     | 1                                     | 32,116, $\infty_4$     |
| 49,80, $\infty_5$      | 159   | 208,11, $\infty_5$     | 60,200, $\infty_6$     | 186                                   | 18,158, $\infty_6$     |
| 83,188, $\infty_7$     | 14    | 97,202, $\infty_7$     | 116,202, $\infty_8$    | 75                                    | 191,49, $\infty_8$     |
| 121,128, $\infty_9$    | 83    | 204,211, $\infty_9$    | 124,127, $\infty_{10}$ | 94                                    | 218,221, $\infty_{10}$ |
| 126,139, $\infty_{11}$ | 150   | 48,61, $\infty_{11}$   | 145,170, $\infty_{12}$ | 130                                   | 47,72, $\infty_{12}$   |
| 164,180, $\infty_{13}$ | 4     | 168,184, $\infty_{13}$ | 168,176, $\infty_{14}$ | 172                                   | 112,120, $\infty_{14}$ |
| 179,194, $\infty_{15}$ | 16    | 195,210, $\infty_{15}$ | 185,199, $\infty_{16}$ | 156                                   | 113,127, $\infty_{16}$ |
| 191,198, $\infty_{17}$ | 34    | 225,4, $\infty_{17}$   | 196,201, $\infty_{18}$ | 168                                   | 136,141, $\infty_{18}$ |

Table 10 (Cont.)

| C                       |       | R                       |                         | A (1,2;3)-frame of type $12^{20}18^1$ |                         |  |
|-------------------------|-------|-------------------------|-------------------------|---------------------------------------|-------------------------|--|
| Starter                 | Adder | Starter+ Adder          | Starter                 |                                       |                         |  |
| 16,30,44                |       | 45,86,133               |                         |                                       |                         |  |
| 77,154,231              |       | 74,144,223              |                         |                                       |                         |  |
| 69,134,208              |       | 34,68,102               |                         |                                       |                         |  |
| 58,122,186              |       | 19,36,62                |                         |                                       |                         |  |
| 53,105,157              |       | 50,103,153              |                         |                                       |                         |  |
| 26,49,75                |       | 28,56,87                |                         |                                       |                         |  |
| Starter                 | Adder | Starter+ Adder          | Starter                 | Adder                                 | Starter + Adder         |  |
| 64, 185, 221            | 114   | 178, 59, 95             | 46, 133, 187            | 189                                   | 235, 82, 136            |  |
| 107, 169, 225           | 119   | 226, 48, 104            | 35, 73, 183             | 208                                   | 3, 41, 151              |  |
| 65, 136, 211            | 54    | 119, 190, 25            | 67, 195, 222            | 108                                   | 175, 63, 90             |  |
| 61, 163, 188            | 202   | 23, 125, 150            | 74, 123, 213            | 81                                    | 155, 204, 54            |  |
| 57, 125, 162            | 159   | 216, 44, 81             | 89, 177, 235            | 56                                    | 145, 233, 51            |  |
| 27, 39, 51              | 228   | 15, 27, 39              | 19, 170, 181            | 153                                   | 172, 83, 94             |  |
| 103, 173, 234           | 236   | 99, 169, 230            | 114, 159, 205           | 48                                    | 162, 207, 13            |  |
| 68, 141, 224            | 95    | 163, 236, 79            | 12, 22, 31              | 125                                   | 137, 147, 156           |  |
| 95, 174, 237            | 29    | 124, 203, 26            | 52, 81, 110             | 17                                    | 69, 98, 127             |  |
| 109, 152, 191           | 65    | 174, 217, 16            | 101, 143, 218           | 163                                   | 24, 66, 141             |  |
| 90, 146, 209            | 225   | 75, 131, 194            | 50, 83, 164             | 168                                   | 218, 11, 92             |  |
| 106, 167, 236           | 169   | 35, 96, 165             | 116, 155, 190           | 79                                    | 195, 234, 29            |  |
| 4, 6, 9                 | 238   | 2, 4, 7                 | 98, 165, 232            | 72                                    | 170, 237, 64            |  |
| 11, 201, 207            | 221   | 232, 182, 188           | 111, 166, 219           | 206                                   | 77, 132, 185            |  |
| 85, 182, 230            | 57    | 142, 239, 47            | 113, 158, 227           | 70                                    | 183, 228, 57            |  |
| 71, 126, 215            | 179   | 10, 65, 154             | 70, 151, 193            | 78                                    | 148, 229, 31            |  |
| 33, 48, 63              | 113   | 146, 161, 176           | 25, 43, 62              | 64                                    | 89, 107, 126            |  |
| 66, 175, 216            | 136   | 202, 71, 112            | 102, 168, 239           | 211                                   | 73, 139, 210            |  |
| 91, 148, 202            | 227   | 78, 135, 189            | 76, 178, 203            | 146                                   | 222, 84, 109            |  |
| 1, 2, 3                 | 210   | 211, 212, 213           | 87, 138, 223            | 134                                   | 221, 32, 117            |  |
| 115, 161, 233           | 222   | 97, 143, 215            | 5, 29, 37               | 86                                    | 91, 115, 123            |  |
| 7, 10, 23               | 186   | 193, 196, 209           | 84, 131, 179            | 27                                    | 111, 158, 206           |  |
| 38, 144, 171            | 8     | 46, 152, 179            | 45, 127, 189            | 156                                   | 201, 43, 105            |  |
| 86, 137, 210            | 44    | 130, 181, 14            | 34, 56, 78              | 214                                   | 8, 30, 52               |  |
| 47, 79, 112             | 112   | 159, 191, 224           | 88, 145, 217            | 28                                    | 116, 173, 5             |  |
| 96, 172, 238            | 123   | 219, 55, 121            | 104, 142, 228           | 45                                    | 149, 187, 33            |  |
| 18, 28, 36              | 213   | 231, 1, 9               | 24, 55, 139             | 143                                   | 167, 198, 42            |  |
| 94, 153, 229            | 216   | 70, 129, 205            | 93, 129, 226            | 35                                    | 128, 164, 21            |  |
| 42, 72, 150             | 96    | 138, 168, 6             | 8, 13, 17               | 59                                    | 67, 72, 76              |  |
| 14, 21, $\infty_1$      | 87    | 101, 108, $\infty_1$    | 15, 156, $\infty_2$     | 43                                    | 58, 199, $\infty_2$     |  |
| 32, 147, $\infty_3$     | 154   | 186, 61, $\infty_3$     | 41, 54, $\infty_4$      | 173                                   | 214, 227, $\infty_4$    |  |
| 59, 82, $\infty_5$      | 75    | 134, 157, $\infty_5$    | 92, 184, $\infty_6$     | 105                                   | 197, 49, $\infty_6$     |  |
| 97, 132, $\infty_7$     | 196   | 53, 88, $\infty_7$      | 99, 192, $\infty_8$     | 158                                   | 17, 110, $\infty_8$     |  |
| 108, 119, $\infty_9$    | 58    | 166, 177, $\infty_9$    | 117, 204, $\infty_{10}$ | 121                                   | 238, 85, $\infty_{10}$  |  |
| 118, 135, $\infty_{11}$ | 90    | 208, 225, $\infty_{11}$ | 121, 214, $\infty_{12}$ | 63                                    | 184, 37, $\infty_{12}$  |  |
| 124, 130, $\infty_{13}$ | 128   | 12, 18, $\infty_{13}$   | 128, 149, $\infty_{14}$ | 205                                   | 93, 114, $\infty_{14}$  |  |
| 176, 197, $\infty_{15}$ | 235   | 171, 192, $\infty_{15}$ | 194, 198, $\infty_{16}$ | 164                                   | 118, 122, $\infty_{16}$ |  |
| 196, 212, $\infty_{17}$ | 66    | 22, 38, $\infty_{17}$   | 199, 206, $\infty_{18}$ | 147                                   | 106, 113, $\infty_{18}$ |  |
